# Supplementary material for: Patient safety culture and satisfaction in Ghana: a facility-based cross-sectional study
Source: PubMed Central journal article supplement — BMJ Open. 2024 Jan 30;14(1):e073190. doi: 10.1136/bmjopen-2023-073190 (PMC10828863; doi:10.1136/bmjopen-2023-073190), 2024-01-30
Supplement: bmjopen-2023-073190.draft_revisions.pdf [file bmjopen-2023-073190.draft_revisions.pdf]

# BMJ Open

BMJ Open is committed to open peer review. As part of this commitment we make the peer review history of every article we publish publicly available.

When an article is published we post the peer reviewers' comments and the authors' responses online. We also post the versions of the paper that were used during peer review. These are the versions that the peer review comments apply to.

The versions of the paper that follow are the versions that were submitted during the peer review process. They are not the versions of record or the final published versions. They should not be cited or distributed as the published version of this manuscript.

BMJ Open is an open access journal and the full, final, typeset and author-corrected version of record of the manuscript is available on our site with no access controls, subscription charges or pay-per-view fees (<http://bmjopen.bmj.com>).

If you have any questions on BMJ Open's open peer review process please email [info.bmjopen@bmj.com](mailto:info.bmjopen@bmj.com)

# BMJ Open

## PATIENT SAFETY CULTURE: A TRADITION TO PROMOTE PATIENTS SATISFACTION IN HEALTHCARE PROVISION IN GHANA

|                               |                                                                                                                                                                                                                                                                                                                                                                                                                                                                                                                                                                                                                                                                                                                                                                                                                                                                                                                                                                                                         |
|-------------------------------|---------------------------------------------------------------------------------------------------------------------------------------------------------------------------------------------------------------------------------------------------------------------------------------------------------------------------------------------------------------------------------------------------------------------------------------------------------------------------------------------------------------------------------------------------------------------------------------------------------------------------------------------------------------------------------------------------------------------------------------------------------------------------------------------------------------------------------------------------------------------------------------------------------------------------------------------------------------------------------------------------------|
| Journal:                      | <i>BMJ Open</i>                                                                                                                                                                                                                                                                                                                                                                                                                                                                                                                                                                                                                                                                                                                                                                                                                                                                                                                                                                                         |
| Manuscript ID                 | bmjopen-2023-073190                                                                                                                                                                                                                                                                                                                                                                                                                                                                                                                                                                                                                                                                                                                                                                                                                                                                                                                                                                                     |
| Article Type:                 | Original research                                                                                                                                                                                                                                                                                                                                                                                                                                                                                                                                                                                                                                                                                                                                                                                                                                                                                                                                                                                       |
| Date Submitted by the Author: | 28-Feb-2023                                                                                                                                                                                                                                                                                                                                                                                                                                                                                                                                                                                                                                                                                                                                                                                                                                                                                                                                                                                             |
| Complete List of Authors:     | <p>Botchwey, Charles; University of Education Winneba, Health Administration and Education</p> <p>Boateng, Agartha; University of Education Winneba, Health Administration and Education</p> <p>Ahimah, Patricia; University of Education Winneba, Health Administration and Education</p> <p>Acquah, Francis; University of Education Winneba, Health Administration and Education</p> <p>Adoma, Prince; University of Education Winneba, Health Administration and Education</p> <p>Kumah, Emmanuel; University of Education Winneba, Health Administration and Education</p> <p>Boakye, Dorothy; University of Education Winneba, Health Administration and Education</p> <p>Boahen, Ebenezer; University of Education Winneba, Health Administration and Education</p> <p>Kruh, Vivian; University of Cape Coast College of Humanities and Legal Studies, Population and Health</p> <p>Koomson, Joseph; University of Cape Coast College of Humanities and Legal Studies, Population and Health</p> |
| Keywords:                     | Health policy < HEALTH SERVICES ADMINISTRATION & MANAGEMENT, Decision Making, Health Equity, Clinical governance < HEALTH SERVICES ADMINISTRATION & MANAGEMENT                                                                                                                                                                                                                                                                                                                                                                                                                                                                                                                                                                                                                                                                                                                                                                                                                                          |
|                               |                                                                                                                                                                                                                                                                                                                                                                                                                                                                                                                                                                                                                                                                                                                                                                                                                                                                                                                                                                                                         |

SCHOLARONE™  
Manuscripts

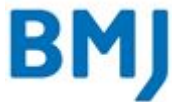

I, the Submitting Author has the right to grant and does grant on behalf of all authors of the Work (as defined in the below author licence), an exclusive licence and/or a non-exclusive licence for contributions from authors who are: i) UK Crown employees; ii) where BMJ has agreed a CC-BY licence shall apply, and/or iii) in accordance with the terms applicable for US Federal Government officers or employees acting as part of their official duties; on a worldwide, perpetual, irrevocable, royalty-free basis to BMJ Publishing Group Ltd ("BMJ") its licensees and where the relevant Journal is co-owned by BMJ to the co-owners of the Journal, to publish the Work in this journal and any other BMJ products and to exploit all rights, as set out in our [licence](#).

The Submitting Author accepts and understands that any supply made under these terms is made by BMJ to the Submitting Author unless you are acting as an employee on behalf of your employer or a postgraduate student of an affiliated institution which is paying any applicable article publishing charge ("APC") for Open Access articles. Where the Submitting Author wishes to make the Work available on an Open Access basis (and intends to pay the relevant APC), the terms of reuse of such Open Access shall be governed by a Creative Commons licence – details of these licences and which [Creative Commons](#) licence will apply to this Work are set out in our licence referred to above.

Other than as permitted in any relevant BMJ Author's Self Archiving Policies, I confirm this Work has not been accepted for publication elsewhere, is not being considered for publication elsewhere and does not duplicate material already published. I confirm all authors consent to publication of this Work and authorise the granting of this licence.

**PATIENT SAFETY CULTURE: A TRADITION TO PROMOTE PATIENTS  
SATISFACTION IN HEALTHCARE PROVISION IN GHANA**

CHARLES OWUSU-ADUOMI BOTCHWEY\*<sup>1</sup>; AGARTHA AFFUL BOATENG<sup>1</sup>; OFORI  
AHIMAH PATRICIA<sup>1</sup>; FRANCIS ACQUAH<sup>1</sup>; PRINCE OWUSU ADOMA<sup>1</sup>; EMMANUEL  
KUMAH<sup>1</sup>; DOROTHY SERWAA BOAKYE<sup>1</sup>; EBENEZER ADDAE BOAHEN<sup>1</sup>; VIVIAN  
KRUH<sup>2</sup> AND JOSEPH BOB KOW KOOMSON<sup>2</sup>

**Lead and Corresponding author:**

Charles Owusu-Aduomi Botchwey, University of Education, Winneba, Faculty of Science  
Education, Department of Health Administration and Education, Post Office Box 25, Winneba,  
Central Region, Ghana. Email address: [chaboat08@yahoo.com](mailto:chaboat08@yahoo.com) Telephone Number:  
+233598014015

**Information about the co-authors:**

1. Agartha Afful Boateng, University of Education, Winneba, Faculty of Science Education, Department of Health Administration and Education, Post Office Box 25, Winneba, Central Region, Ghana.
2. Patricia Ofori Ahimah, University of Education, Winneba, Faculty of Science Education, Department of Health Administration and Education, Post Office Box 25, Winneba, Central Region, Ghana.
3. Francis Acquah, University of Education, Winneba, Faculty of Science Education, Department of Health Administration and Education, Post Office Box 25, Winneba, Central Region, Ghana.
4. Price Owusu Adoma, University of Education, Winneba, Faculty of Science Education, Department of Health Administration and Education, Post Office Box 25, Winneba, Central Region, Ghana.
5. Emmanuel Kumah, University of Education, Winneba, Faculty of Science Education, Department of Health Administration and Education, Post Office Box 25, Winneba, Central Region, Ghana.
6. Dorothy Serwaa Boakye, University of Education, Winneba, Faculty of Science Education, Department of Health Administration and Education, Post Office Box 25, Winneba, Central Region, Ghana.
7. Ebenezer Addae Boahen, University of Education, Winneba, Faculty of Science Education, Department of Health Administration and Education, Post Office Box 25, Winneba, Central Region, Ghana.
8. Vivian Kruh, University of Cape Coast, College of Humanities and Legal Studies, Faculty of Social Sciences, Department of Population and Health, Cape Coast, Ghana.
9. Joseph Bob Kow Koomson, University of Cape Coast, College of Humanities and Legal Studies, Faculty of Social Sciences, Department of Population and Health, Cape Coast, Ghana.

## Highlights

- Policies, measures or strategies to promote patient safety culture in the health facility have not been prioritised thus resulting into poor patient safety culture compliance observed by respondents in this study.
- Positive workplace culture was related to several desirable patient outcomes, such as fewer infections, reduced rates of mortalities and increased patient satisfaction.
- Wrong prescription or surgeries can result into patients paying extra money to rectify these problems at the same health facility or elsewhere.
- Wrong medication could cause some of the respondents to suffer worsening health conditions and contraction of chronic health conditions due to delayed healthcare or risky drug interactions with the body.
- The high level of dissatisfaction with care received at the health facility could be related to 38% of the respondents who were unemployed and hence could not have the financial capacity to pay for extra medication, injection or hospitalisation associated through the effects of adverse events such as increased cost for new medications, injection or charges for unintended or extra hospitalisations.

## What the study adds

The study adds that policies, measures or strategies to encourage patient safety culture in the hospital have not been highlighted, consequently, occasioning poor patient safety culture compliance witnessed by the respondents in the study.

## What is already known on this topic

Patient safety is held as an international health concern influencing patients in various health care settings globally due to the complexity of health care systems and the increase in unsafe care delivered to patients in various health institutions.

## How this study might affect research, practice or policy

This study will add to existing literature on patient safety and serve as a guide to healthcare practitioners and other analogous health professionals in the discharge of their mandate. Again, the findings of this study will help policymakers to appreciate the relevance of patient safety culture in the attainment of “quality health for all” by strengthening the existing policies to check deviations in various health care facilities.

## Abstract

**Background:** Globally, one of the measures of high performing healthcare facilities is the compliance of patient safety culture, which encompasses the ability of health institutions to avoid or drastically reduce patient harm or risks. These risks or harm is linked with numerous adverse patient outcomes such as medication error, infections, unsafe surgery and diagnosis error.

**Objectives:** The general objective of this study was to investigate into the impact of patient safety culture experienced on patient satisfaction among patients who attend the Kwesimintsim Government Hospital in the Takoradi Municipality.

**Methods:** This study was a descriptive cross-sectional study and a consecutive sampling technique was used to select 100 respondents for the study. Data was collected using a structured questionnaire and processed using Statistical Package for Social Sciences, version 21. Descriptive statistics were used to analyse the findings by summarising them into percentages, frequencies, charts and tables.

**Results:** The study found out that the overall patient safety compliance level observed by the respondents was poor (31%). The prevalence of adverse events experienced among the respondents was average (56%). The adverse events mentioned were medication error (45%), infections (40%), unsafe surgery (10%), diagnosis error (27%), wrong injection (12%), wrong treatment procedure (31%) and wrong prescription (48%). The mentioned consequences of these adverse events encountered by the respondents was hospitalisation (45%), followed by increased healthcare cost (35%), worsening of health condition (24%) and the least was contraction of chronic health conditions (13%). In all, 70% of respondents were dissatisfied with care received at the health facility and about one-third (30%) were satisfied.

**Conclusion:** The poor general compliance of patient safety culture in the facility is unfortunate and this can affect the reputation of the hospital. The study recommends that a collaboration between government and stakeholders to implement novel interventions to promote and sustain patient safety protocols compliance at the Kwesimintsim Government Hospital must be upheld.

**Keywords:** Patient satisfaction, Government, Prevalence, Hospitalisation and Prescription.

**The article has a word count of 5670 excluding title page, references, figures and tables.**

## 1. Background of the Study

Patient safety culture is an essential factor in determining the ability of hospitals to treat and reduce patient risks.<sup>1</sup> Patient safety is regarded as an international health concern affecting patients in various health care settings globally due to the complexity of health care systems and the increase in unsafe care delivered to patients in various health institutions.<sup>2, 3</sup> Patient safety culture is an integrated pattern of individual and organisational behaviour, based upon shared beliefs and values that continuously seek to minimise the patient harm, which may result from the process of care delivery.<sup>3</sup> It is also referred to as the outcome of individual and organisation's values, attitudes, perceptions, competencies, and patterns of behaviour that determine the commitment to, and the style and proficiency of, an organisation's health and safety management.<sup>4</sup> All these could be achieved through setting up clear policies, having skilled healthcare professionals, all-level leadership, up-to-date data, and patient-centered care in order to maintain healthcare safety sustainability.<sup>3</sup> Several studies stress the importance of patient safety culture for patient safety processes and outcomes.<sup>5</sup> More specifically, research has shown that a sound patient safety culture is associated with fewer adverse events<sup>6</sup> and more positive patient experiences.<sup>7</sup> A systematic review by Braithwaite et al.<sup>5</sup> found that a positive workplace culture was related to several desirable patient outcomes, such as fewer infections, reduced rates of mortalities and increased patient satisfaction. Studies have also shown that promoting patient safety culture among healthcare providers is a key to reducing adverse events and maintaining quality of care.<sup>8</sup>

Adverse events also known as medical errors is one of the numerous factors that affect patient safety within health facilities. Adverse events are 'unintended injuries or complications that are caused by health care management rather than by the patient's underlying disease and can lead to death, disability at the time of discharge and prolonged hospital stay.'<sup>9</sup> Adverse events or medical

1  
2  
3 errors that significantly contribute to unsafe care and harm to patients which subsequently affect  
4 patient safety are medication errors, nosocomial infections, unsafe surgeries, wrong injections,  
5 procedures, and diagnostic errors.<sup>10</sup> The prevalence of adverse events by medical professionals has  
6 been alarming. In Iran, a review study revealed that the prevalence of adverse events exists  
7 between 10 and 80%.<sup>11</sup> Another study conducted on the prevalence of adverse events revealed that  
8 about 7 out of 10 selected professional nurses declared engaging in adverse events resulting in  
9 harm to patients.<sup>12</sup>

10 Measures taken to improve upon patient safety have demonstrated different levels of  
11 effectiveness.<sup>13</sup> Moreover, several prior studies conducted among medical staff have shown that  
12 higher levels of awareness of patient safety culture are associated with higher patient overall  
13 satisfaction and lower occurrence of adverse events.<sup>14,15</sup> It is against this background that the  
14 researcher seeks to investigate into patient safety culture among patients and its impact on their  
15 overall satisfaction of care received at the Kwesimintim Government Hospital in the Takoradi  
16 municipality of Ghana.

## 17 18 19 20 21 22 23 24 25 26 27 28 29 30 31 32 33 34 35 36 37 38 39 40 41 42 43 44 45 46 47 48 49 50 51 52 53 54 55 56 57 58 59 60

### 2. Objective

The general objective of this study is to investigate into the impact of patient safety culture experienced on patient satisfaction among patients who attend the Kwesimintim Government Hospital in the Takoradi Municipality. Specifically, this study sought to: (a) identify patient safety culture protocols compliance by health workers and management of the Kwesimintim Government Hospital in the Takoradi Municipality (b) measure the prevalence of adverse events and their effects on patients among patients who attend the Kwesimintim Government Hospital in the Takoradi Municipality and (c) examine the impact of patient safety culture on patient



1  
2  
3 satisfaction among patients who attend the Kwesimintsim Government Hospital in the Takoradi  
4  
5 Municipality.  
6

### 9 **3. Methods**

10  
11 This study deployed a descriptive cross-sectional study design using a quantitative approach to  
12  
13 obtain the necessary data required for the accomplishment of this study. This design and approach  
14  
15 to research focuses on carefully measuring a set of variables to answer theory-guided research  
16  
17 questions or hypotheses<sup>16</sup>. The study was conducted at Kwesimintsim Government Hospital. The  
18  
19 target population for this study is all patients visiting the Kwesimintsim Government Hospital in  
20  
21 the Takoradi Municipality for healthcare.  
22  
23

24  
25  
26 The Kwesimintsim Government Hospital receives averagely 150 patients per week (Health  
27  
28 information records; Kwesimintsim Government Hospital, 2021). From this figure, Yamane's  
29  
30 formula will be used to calculate the sample size for this study. Yamane's formula is given as  
31

$$32 \quad n = \frac{N}{1 + N(e^2)},$$

33  
34  
35  
36 Where n is the sample size, N is the study population size and e is the level of precision. The study  
37  
38 population for this study is presumed to be 150. The level of precision to be used is 0.05(95%  
39  
40 confidence interval). After computation, the sample size derived is 100.  
41

$$42 \quad n = \frac{150}{1 + 150(0.005^2)},$$

$$43 \quad n = 100.$$

44  
45  
46  
47  
48  
49 Consecutive sampling method whereby every eligible and available participant was recruited till  
50  
51 the desired sample size was reached based on the inclusion criteria applied in this study. This  
52  
53 method was appropriate for the study because of the ill-health conditions of patients which often  
54  
55  
56  
57

1  
2  
3 make some of them not fit or ready for data collection. The study included patients visiting the  
4  
5 Kwesimintsim Government Hospital who were present during the data collection period and who  
6  
7 consented to participate in the study. Patients visiting the Kwesimintsim Government Hospital  
8  
9 who were present during the data collection period in addition to those who refused to participate  
10  
11 in this study were excluded from the study. The study also excluded patients admitted at the various  
12  
13 wards of the health facility  
14  
15

16  
17  
18 Structured (closed and open-ended) questionnaire was used to seek information from the sampled  
19  
20 respondents. The questionnaire was designed through extensive literature search and other similar  
21  
22 studies conducted which were related to the study. The questionnaires was self-administered and  
23  
24 a high level of discretion was kept to protect the identities and views of the respondents. The  
25  
26 questionnaire was made up of four parts. The first part interrogated the respondents on their  
27  
28 demographic information. The second part interrogated the respondents on the compliance of  
29  
30 patient safety culture protocols witnessed in the facility. The third part interrogated the respondents  
31  
32 on adverse events they have experienced in the health facility and it consequences among them.  
33  
34 The final part of the questionnaire interrogated the respondents on their satisfaction regarding  
35  
36 patient safety culture witnessed and care received at the health facility. Data obtained from the  
37  
38 study were entered into a Microsoft Excel spreadsheet and imported into SPSS computational tool  
39  
40 (version 22) to generate the study findings. The findings of the study were analysed and interpreted  
41  
42 through the use of descriptive statistics such as percentages and frequencies. The findings of the  
43  
44 study were presented using tables and charts. Participation in the study was voluntary; no coercion  
45  
46 was used and respondents were assured that no repercussions will follow respondents who were  
47  
48 unwilling to participate. Willing respondents signed an informed consent form expressing their  
49  
50 willingness to participate in the study. Anonymity of respondents was assured by coding all  
51  
52  
53  
54  
55  
56  
57  
58  
59  
60

1  
2  
3 questionnaires uniquely using numbers and by not recording names of respondents. Confidentiality  
4  
5 of information provided by the respondents was upheld. Permission was also sought from  
6  
7 management of the ethics committee of the health facility before the study will commence  
8  
9

## 10 11 **4. Presentation of Results**

### 12 13 14 **4.1 Demographic Characteristics of the Respondents**

15  
16  
17 More than half of the respondents (n=63, 63%) were females and males constituted 37% of the  
18  
19 respondents (n=37). More than half of the respondents were aged 31-40 years (n=54, 54%),  
20  
21 followed by respondents aged 21-30 years (n=36, 36%), followed by respondents aged 41 years  
22  
23 and over (n=7, 7%) and less than a quarter (n=3, 3%) were aged 16-20 years. An overwhelming  
24  
25 majority of the respondents were Christians (n=95, 95%) and the remaining few were Muslims  
26  
27 (n=5, 5%). Majority of the respondents were single in terms of marital status (n=46) denoting 63%  
28  
29 of the respondents, a little over one-fourth were married (n=28, 28%) and almost one out of every  
30  
31 10 respondents was a divorcee (n=9, 9%). With respect to the educational qualification of the 100  
32  
33 respondents, almost half of them were basic school and Senior High School graduates (n=46,  
34  
35 46%), followed by respondents with no formal education (n=6, 6%) and very minute portion of  
36  
37 the respondents (n=2, 2%) were University graduates. With regards to the employment category  
38  
39 of the respondents, almost half of them were self-employed (n=49, 49%), followed by more than  
40  
41 one-third who were unemployed (n=38, 38%), followed by students who were 8 in number (8%),  
42  
43 followed by respondents who were private-sector employees (n=4, 4%) and only 1 of the  
44  
45 respondents (1%) was a government-employee. Table 1 summarises the demographic  
46  
47 characteristics of the respondents.  
48  
49  
50  
51  
52  
53  
54  
55  
56  
57  
58  
59  
60

**Table 1: Demographic characteristics of the respondents.**

| <b>Characteristics</b>                          | <b>Frequency</b> | <b>Percentage (%)</b> |
|-------------------------------------------------|------------------|-----------------------|
| <b>Gender of respondents</b>                    |                  |                       |
| Females                                         | 37               | 37%                   |
| Males                                           | 63               | 63%                   |
| <b>Age of respondents</b>                       |                  |                       |
| 16-20                                           | 3                | 3%                    |
| 21-30                                           | 36               | 36%                   |
| 31-40                                           | 54               | 54%                   |
| 41 and over                                     | 7                | 7%                    |
| <b>Marital status of respondents</b>            |                  |                       |
| Single                                          | 63               | 63%                   |
| Married                                         | 28               | 28%                   |
| Divorced                                        | 9                | 9%                    |
| <b>Religion of respondents</b>                  |                  |                       |
| Christians                                      | 95               | 95%                   |
| Muslims                                         | 5                | 5%                    |
| <b>Employment category of respondents</b>       |                  |                       |
| Unemployed                                      | 38               | 38%                   |
| Government employee                             | 1                | 1%                    |
| Private-sector employee                         | 4                | 4%                    |
| Self-employed                                   | 49               | 49%                   |
| Student                                         | 8                | 8%                    |
| <b>Educational qualification of respondents</b> |                  |                       |
| No formal education                             | 6                | 6%                    |
| Basic education                                 | 46               | 46%                   |
| Secondary education                             | 46               | 46%                   |
| Bachelor's degree                               | 2                | 2%                    |

**Source: Field Survey, September (2022).**

#### **4.2 Patient safety culture protocols compliance**

The first objective of the study was to identify patient safety culture protocols compliance by health workers and management of the Kwesimintsim Government Hospital in the Takoradi Municipality from the perspectives of patients. The study presented 13 patient safety protocols statements for which the respondents (patients) were asked to state if each of the protocols were observed by staff

and management of the health facility. The overall score for compliance was computed through evaluating the mean score of the protocols investigated. The overall safety protocol compliance level was found to be very abysmal (31%) in this study. Table 2 presents these findings.

**Table 2: Patient safety culture protocols compliance.**

| Safety Protocols                                                                     | Frequency | Percentage |
|--------------------------------------------------------------------------------------|-----------|------------|
| When one unit gets busy, other health workers help.                                  | 91        | 91%        |
| Staff actively do things to improve patient safety.                                  | 35        | 35%        |
| Hospital units work well together to provide the best care for patients.             | 72        | 72%        |
| Hospital management provides a work climate that promotes patient safety.            | 52        | 52%        |
| The actions of hospital management show that patient safety is a top priority.       | 47        | 47%        |
| Important patient care information is often not lost among staff.                    | 60        | 60%        |
| Problems do not often occur in the exchange of information across the units.         | 14        | 14%        |
| Patient safety is never sacrificed to get work done.                                 | 10        | 10%        |
| The procedures and systems at the facility are good at preventing errors.            | 0         | 0          |
| Staff freely speak up if they see something that may negatively affect patient care. | 0         | 0          |
| Staff feel free to question the decisions of those with more authority.              | 0         | 0          |
| Staff are not afraid to ask questions when something does not seem right.            | 0         | 0          |
| Staff report any error they make to promote patient safety.                          | 1%        | 1%         |
| <b>Overall average compliance level</b>                                              | <b>31</b> | <b>31%</b> |

Source: Field Survey, September (2022).

### 4.3 Prevalence of adverse events and their effects on patients

The study further investigated into the prevalence of adverse events and their effects on patients among patients who attend the Kwesimintsim Government Hospital in the Takoradi Municipality. The study discovered that almost 6 out of 10 respondents (56 respondents) had encountered harm or problem as a result of care received at the Kwesimintsim Government Hospital thus denoting a prevalence rate of adverse events experienced to be 56%. The problems or harm encountered

among the respondents were medication error (n=45, 45%), infections (n=40, 40%), unsafe surgery (n=10, 10%), diagnosis error (n=27, 27%), wrong injection (n=12, 12%), wrong treatment procedure (n= 31, 31%) and wrong prescription (n=48, 48%). Table 3 presents these findings. The most mentioned consequence of these harm or problems encountered by the respondents was hospitalisation (45%), followed by increased healthcare cost (35%), worsening of health condition (24%) and the least was contraction of chronic health conditions (13%). Table 3 and Figure 1 show these results.

**Table 3: Problems or harms encountered among the respondents.**

| Harm or problem encountered | Frequency | Percentage (%) |
|-----------------------------|-----------|----------------|
| Medication error            | 45        | 45%            |
| Infections                  | 40        | 40%            |
| Unsafe surgery              | 10        | 10%            |
| Diagnosis error             | 27        | 27%            |
| Wrong injection             | 12        | 12%            |
| Wrong treatment procedure   | 31        | 31%            |
| Wrong prescription          | 48        | 48%            |

Source: Field Survey, September (2022).

#### 4.4 The impact of Patient Safety Culture Experienced on Patient Satisfaction among Respondents

The final objective of this study was to investigate the impact of patient safety culture experienced on patient satisfaction among respondents. Findings indicated that five out of every 10 respondents (52%) were dissatisfied with patient safety protocols at the Kwesimintsim Government Hospital, followed by a little below one-fifth (n=18, 18%) who were very satisfied, followed by 16% of the respondents (n=16) who were very dissatisfied and finally, 14 of the respondents (14%) were

1  
2  
3 satisfied with patient safety protocols at the Kwesimintsim Government Hospital. Therefore, the  
4 prevalence of adverse events (56%) is likely to affect the high dissatisfaction level of the  
5 respondents in this study. Figure 2 depicts these results.  
6  
7  
8  
9  
10  
11

## 12 **5. Discussion of Results**

### 13 **5.1 Demographic Characteristics of Respondents**

14  
15 More than half of the respondents (63%) were females and males constituted 37% of the  
16 respondents. This finding could be attributable the selection criteria used for the study. More than  
17 half of the respondents were aged 31-40 years (54%), followed by respondents aged 21-30 years  
18 (36%), followed by respondents aged 41 years and over (7%) and less than a quarter (3%) were  
19 aged 16-20 years. An overwhelming majority of the respondents were Christians (95%) and the  
20 remaining few were Muslims (5%). This finding is not surprising because the latest information  
21 from the Ghana Statistical Service indicate that majority of Ghanaians (70%) are Christians.<sup>17</sup>  
22 Majority of the respondents were single in terms of marital status (63%), a little over one-fourth  
23 were married (28%) and almost one out of every 10 respondents was a divorcee (9%). With respect  
24 to the educational qualification of the 100 respondents, almost half of them were basic school and  
25 SHS graduates (46%), followed by respondents with no formal education (6%) and very minute  
26 portion of the respondents (2%) were University graduates. Findings may provide evidence of the  
27 impact of the free SHS policy in Ghana that has resulted into a very high enrolment of Ghanaians  
28 in Senior High Schools. With regards to the employment category of the respondents, almost half  
29 of them were self-employed (49%), followed by more than one-third who were unemployed (n=38,  
30 38%), followed by students who were 8 in number (8%), followed by respondents who were  
31 private-sector employees (4%) and only 1 of the respondents (1%) was a government-employee.  
32  
33  
34  
35  
36  
37  
38  
39  
40  
41  
42  
43  
44  
45  
46  
47  
48  
49  
50  
51  
52  
53  
54  
55  
56  
57  
58  
59  
60

1  
2  
3 Irrespective of the fact that sample size and selection eligibility used for this study could account  
4 for these findings, findings support information from Ghana Statistical Service that the private  
5 sector is the largest source of employment in the country.<sup>17</sup>  
6  
7  
8  
9

## 10 **5.2 Patient safety culture protocols compliance by health workers and management of the** 11 **Kwesimintsim Government Hospital in the Takoradi Municipality** 12 13

14 The first objective of this study was to identify patient safety culture protocols compliance by  
15 health workers of the Kwesimintsim Government Hospital in the Takoradi Municipality from the  
16 perspectives of patients. The study presented 13 patient safety protocols statements for which the  
17 respondents (patients) were asked to state if each of the protocols were observed by staff and  
18 management of the health facility. The overall score for compliance was computed through  
19 evaluating the mean score of the protocols investigated. The overall safety protocol compliance  
20 level was found to be very abysmal (31%) in this study. Findings were lower compared with the  
21 studies by<sup>4</sup> where the overall safety protocol compliance level was 47% as well as<sup>18</sup> where overall  
22 safety protocol compliance level was 58%. It is worthy to note that these studies assessed patient  
23 safety culture compliance from the perspectives of medical staff as compared to this study where  
24 patients were used to assess patient safety culture compliance. This factor could significantly affect  
25 these findings in relation to over or under reporting of patient safety culture compliance among  
26 them. Nonetheless, findings in this study imply that the assessed patient safety culture compliance  
27 at the Kwesimintsim Government Hospital is unsatisfactory and unacceptable.  
28  
29  
30  
31  
32  
33  
34  
35  
36  
37  
38  
39  
40  
41  
42  
43  
44  
45  
46

47 Research have shown that patient safety culture is an essential factor in determining the ability of  
48 hospitals to treat and reduce patient risks.<sup>1</sup> Not differently, it is the outcome of individual and  
49 organisation's values, attitudes, perceptions, competencies, and patterns of behavior that determine  
50 the commitment to, and the style and proficiency of, an organisation's health and safety  
51  
52  
53  
54  
55  
56  
57



1  
2  
3 management.<sup>4</sup> All these could be achieved through setting up clear policies, having skilled  
4  
5 healthcare professionals, all-level leadership, up-to-date data, and patient-centered care in order to  
6  
7 maintain healthcare safety sustainability.<sup>3</sup>  
8  
9

10  
11 In as much as some of the respondents may be bias in their responses, findings give an indication  
12  
13 that polices, measures or strategies to promote patient safety culture in the health facility have not  
14  
15 been prioritised thus resulting into poor patient safety culture compliance observed by respondents  
16  
17 in this study. The most observed safety protocols in this study were when one unit gets busy, other  
18  
19 health workers help (91%), hospital units works well together to provide the best of care for  
20  
21 patients (72%) and important patient care information is often not lost among staff (60%). Findings  
22  
23 were somewhat similar to the study by.<sup>18</sup> where the most observed patient safety culture were one  
24  
25 unit gets busy, other health workers help (65.1%), staff actively do things to improve patient safety  
26  
27 (89.1%), hospital units works well together to provide the best of care for patients (78.1%),  
28  
29 important patient care information is often not lost among staff (66.7%) and staff freely speak up  
30  
31 if they see something that may negatively affect patient safety care (70.3%). Apart from 6% of the  
32  
33 respondents who were uneducated and may not be acknowledgeable about patient safety culture  
34  
35 compliance among medical staff, a greater majority of respondents (94%) were educated and hence  
36  
37 findings regarding these patient safety protocols may reflect the true nature of these safety  
38  
39 protocols observed by medical staff of the Kwesimintsim Government Hospital. However,  
40  
41 protocols concerning the communication openness with authorities with regards to patient safety  
42  
43 recorded the lowest score in this study. For instance, none of the respondents (0%) admitted that  
44  
45 staff freely speak up if they see something that may negatively affect patient care, staff feel free to  
46  
47 question the decisions of those with more authority and staff are not afraid to ask questions when  
48  
49 something does not seem right. Also, only 1 of the respondents (1%) admitted that staff report any  
50  
51  
52  
53  
54  
55  
56  
57  
58  
59  
60

1  
2  
3 error they make to promote patient. One reason for this poor finding may be related to the fact that  
4  
5 apart from open conversation with authorities, patients may not be aware of other ways through  
6  
7 which medical staff communicate with authority at the health facility. Also, the discrepancies in  
8  
9 the number of visits to the health facility among the respondents could affect their observation of  
10  
11 these patient safety protocols compliances. However, regardless of the fact that communication  
12  
13 openness with authorities among medical staff (17.9%) was found to be low among others  
14  
15 investigated in the study by<sup>4</sup> comparably, it was found to be high in relation to this study. The  
16  
17 discrepancies could be related to differences in study population used for these studies.  
18  
19 Notwithstanding this, findings were very low and could deprive the health facility from some  
20  
21 benefits. For instance, it can be inferred from studies that positive workplace culture was related  
22  
23 to several desirable patient outcomes, such as fewer infections, reduced rates of mortalities and  
24  
25 increased patient satisfaction.<sup>5</sup>  
26  
27  
28  
29

### 30 31 **5.3 Prevalence of Adverse Events and their Effects on Patients among Patients Who Attend** 32 33 **the Kwesimintsim Government Hospital in the Takoradi Municipality.** 34 35

36 The study further investigated into the prevalence of adverse events and their effects on patients  
37  
38 among patients who attend the Kwesimintsim Government Hospital in the Takoradi Municipality.  
39  
40 The study discovered that almost 6 of the 10 respondents (56 of the respondents) had encountered  
41  
42 harm or problem as a result of care received at the Kwesimintsim Government Hospital thus  
43  
44 denoting a prevalence rate of adverse events experienced to be 56%. Adverse events are  
45  
46 unintended injuries or complications that are caused by health care management rather than by the  
47  
48 patient's underlying disease.<sup>9</sup> It has been well established by research that promoting patient safety  
49  
50 culture among healthcare providers is a key to reducing adverse events and maintaining quality of  
51  
52 care.<sup>8</sup> Therefore, any healthcare jurisdiction that compromises compliance with patient safety  
53  
54  
55  
56  
57

1  
2  
3 culture is likely to expose their patients with these ramifications. The study found an overall patient  
4 safety culture among the respondents to be very low (31%). It is not surprising that some of the  
5 respondents (56%) have experienced these adverse events. Finding support literature that the  
6 negligence of medical staff leads to the development of adverse events among patients. This  
7 information can be inferred from a review study in Iran that revealed that the prevalence of adverse  
8 events exists between 10 and 80% in Iranian Hospitals.<sup>11</sup> Another study conducted on the  
9 prevalence of adverse events revealed that about 7 out of 10 selected professional nurses (70%)  
10 declared engaging in adverse events resulting in harm to patients.<sup>12</sup> All these findings were in line  
11 with what was discovered in this study. The problems or harm encountered among the respondents  
12 were medication error (45%), infections (40%), unsafe surgery (10%), diagnosis error (27%),  
13 wrong injection (12%), wrong treatment procedure (31%) and wrong prescription (48%). These  
14 findings could be related to poor communication of medical staff with authority, inadequate  
15 resources and medical staff as well as poor skills among medical staff at the health facility. For  
16 instance, poor communication and skills could lead to medication error, unsafe surgery, diagnosis  
17 error, wrong injection, wrong treatment procedure and wrong prescription as mentioned by the  
18 respondents. All these adverse events mentioned by the respondents are consistent with literature  
19 that adverse events or medical errors that significantly contribute to unsafe care and harm to  
20 patients which subsequently affect patient safety are medication errors, nosocomial infections,  
21 unsafe surgeries, wrong injections, procedures, and diagnostic errors.<sup>10</sup>

22  
23  
24  
25  
26  
27  
28  
29  
30  
31  
32  
33  
34  
35  
36  
37  
38  
39  
40  
41  
42  
43  
44  
45  
46  
47  
48 In addition to these adverse events which are problematic and avoidable through compliance with  
49 patient safety culture, the prevalence of adverse events can lead to death, disability at the time of  
50 discharge and prolonged hospital stay.<sup>9</sup> It may be for these consequences for which some of the  
51 respondents who have experienced adverse events mentioned hospitalisation (45%), followed by  
52  
53  
54  
55  
56  
57

1  
2  
3 increased healthcare cost (35%), worsening of health condition (24%) and contraction of chronic  
4 health conditions (13%) as consequences of adverse events they have experienced. Wrong  
5 prescription or surgeries can result into patients paying extra money to rectify these problems at  
6 the same health facility or elsewhere. Wrong medication could cause some of the respondents to  
7 suffer worsening of health condition and contraction of chronic health conditions due to delayed  
8 healthcare or risky drug interactions with the body.  
9

#### 17 **5.4 The impact of Patient Safety Culture Experienced on Patient Satisfaction among** 18 **Respondents** 19

20  
21  
22 The final objective of this study was to investigate the impact of patient safety culture experienced  
23 on patient satisfaction among respondents. Findings revealed that five out of every 10 respondents  
24 (52%) were dissatisfied with patient safety protocols at the Kwesimintsim Government Hospital,  
25 followed by a little below one-fifth (18%) who were very satisfied, followed by 16% of the  
26 respondents (n=16) who were very dissatisfied and finally, 14% of the respondents were satisfied  
27 with patient safety protocols at the Kwesimintsim Government Hospital. The findings of this study  
28 contradict with<sup>19</sup>, where patient satisfaction with protocols and services was excellent.  
29

30  
31  
32 Therefore, the prevalence of adverse events (56%) is likely to affect the high dissatisfaction level  
33 of the respondents in this study. Patients visit the health facility for healthcare and not to worsen  
34 their ill-health through encountering adverse events emanating from non-compliance of patient  
35 safety protocols among medical staff. Patients are therefore likely to express their frustration and  
36 disgust towards healthcare facility management and staff whenever they experience these  
37 problems at the health facility. In general, 7 out of 10 respondents (70%) were dissatisfied with  
38 care received at the health facility as about one-third (30%) were satisfied. The respondents who  
39  
40  
41  
42  
43  
44  
45  
46  
47  
48  
49  
50  
51  
52  
53  
54  
55  
56  
57  
58  
59  
60

1  
2  
3 were dissatisfied with care received at the health facility are likely to be those who had experienced  
4  
5 adverse events (56%).  
6

7  
8 For instance, the respondents who had suffered hospitalisation, increased healthcare cost,  
9  
10 worsening of health condition and contraction of chronic health conditions through the experience  
11  
12 of adverse events such as medication errors, unsafe surgery, diagnosis error, wrong injection,  
13  
14 wrong treatment procedure and wrong prescription are likely to be dissatisfied with care received  
15  
16 at the hospital. The high level of dissatisfaction with care received at the health facility could be  
17  
18 related to 38% of the respondents who were unemployed and hence could not have the financial  
19  
20 capacity to pay for extra medication, injection or hospitalisation associated through the effects of  
21  
22 adverse events such as increased cost for new medications, injection or charges for unintended or  
23  
24 extra hospitalisations.  
25  
26  
27  
28

## 29 30 **6. Conclusion**

31  
32 One of the hallmarks of modern healthcare institutions is the compliance of patient safety culture.  
33  
34 This action exposes patients to less risks and harm at the health facilities. This study discovered  
35  
36 that there was a poor general compliance of patient safety culture among staff at the Kwesimintsim  
37  
38 Government Hospital. More than half of the respondents had experienced adverse events and were  
39  
40 very likely to be dissatisfied with care received the health facility. This calls for a collaboration  
41  
42 between government and stakeholders to implement novel interventions to promote and sustain  
43  
44 patient safety protocols compliance at the Kwesimintsim Government Hospital.  
45  
46  
47  
48  
49  
50  
51  
52  
53  
54  
55  
56  
57  
58  
59  
60

## References

1. Kakemam, E., Albelbeisi, A. H., Davoodabadi, S., Ghafari, M., Dehghandar, Z., & Raeissi, P. (2022). Patient safety culture in Iranian teaching hospitals: baseline assessment, opportunities for improvement and benchmarking. *BMC Health Services Research*.  
<https://doi.org/10.1186/s12913-022-07774-0>
2. Hamdat, M., Saleem, A.A. (2018) Changes in patient safety culture in Palestinian public hospitals: impact of quality and patient safety initiatives and programs. *J Patient Saf*; 14(3):e67–73.
3. W.H.O (2019). Patient Safety, Key facts. Available from:  
<https://www.who.int/news-room/fact-sheets/detail/patient-safety>
4. El-Sherbiny, N. A., Ibrahim, E. H., & Abdul-Wahed, W. Y. (2020). Assessment of patient safety culture among paramedical personnel at the general and district hospitals, Fayoum Governorte, Egypt. <https://doi.org/10.1186/s42506-019-0031-8>
5. Braithwaite, J., Herkes, J., Ludlow, K., Testa, L., Lamprell, G. (2017) Association between organisational and workplace cultures, and patient outcomes: systematic review. *BMJ Open*.  
<https://doi.org/10.1136/bmjopen-2017-017708>.
6. Najjar, S., Nafouri, N., Vanhaecht, K., Euwema, M. (2015). The relationship between patient safety culture and adverse events: a study in Palestinian hospitals. *Saf Health*.  
<https://doi.org/10.1186/s40886-015-0008-z>.
7. Abrahamson, K., Hass, Z., Morgan, K., Fulton, B., Ramanujam, R. (2016). The relationship between nurse-reported safety culture and the patient experience. *J Nurs Admin*;46(12):662–8
8. Sorra, J., Laura, G., Suzanne, S., Theresa, F., Naomi, Y., Westat, R. (2016). AHRQ Hospital Survey on Patient Safety Culture: User’s Guide 540 Gaither Road, Rockville, MD 20850: Agency for Healthcare Research and Quality. U.S. Department of Health and Human Services.
9. Panagioti, M., Stokes, J., Esmail, A., Coventry, P., Cheraghi-Sohi, S., Alam, R. (2015). Multimorbidity and patient safety incidents in primary care: a systematic review and meta-analysis. *PLoS One*; 10(8): e0135947. <https://doi.org/10.1371/journal.pone.0135947> PMID: [26317435](https://pubmed.ncbi.nlm.nih.gov/26317435/)
10. Ghasemi, M., Khoshakhlagh A. H., Mahmudi, S. & Fesharaki, G. M. (2015). Identification and assessment of medical errors in the triage area of an educational hospital using the SHERPA technique in Iran. *International Journal of Occupation Safety and Ergonomics*. 21(3), 382-390  
<https://doi.org/10.1080/10803548.2015.1073431>

11. Vaziri, S., Fakouri, F., Mirzaei, M., Afsharian, M., Azizi, M., Arab-Zozani, M. (2019). Prevalence of medical errors in Iran: a systematic review and meta-analysis. *BMC Health Serv Res*; 19 (1):1–11.
12. Kakemam E, Albelbeisi AH, Davoodabadi S, Azarmi M, Zolghadr F, Mamene M. (2016). The impact of nurses' perceptions of systems thinking on occurrence and reporting of adverse events: a cross-sectional study. *Journal of Nursing Management*
13. Donaldson, L., Ricciardi, W., Sheridan, S., Tartaglia, R. (2021). *Textbook of Patient Safety and Clinical Risk Management*: Springer Nature.
14. Wang, C. H., & Yen, C. D. (2015). Leadership and turnover intentions of Taiwan TV reporters: The moderating role of safety climate. *Asian Journal of Communication*, 25(3), 255-270.
15. Yesilyaprak, T., Demir, T., Korkmaz, F. (2021). The relationship between surgical intensive care unit nurses' patient safety culture and adverse events. *Nursing Critical Care*.
16. Creswell, J. W. (2014). *Research Design: qualitative, quantitative and mixed methods approaches* (4th ed.). *Thousand Oaks, CA*: Sage
17. Ghana Statistical Service, 2021
18. Akologo, A., Abuosi, A. A. & Anaba, E. A. (2019). A cross-sectional survey on patient safety culture among healthcare providers in the Upper East region of Ghana. *PLoS ONE*. 14(8): e0221208. <https://doi.org/10.1371/journal.pone.0221208>
19. Okafor, C. H., Ugwu, A. C. & Okon, I. E. (2018). Effects of patient safety culture on patient satisfaction with radiological services in Nigerian radio diagnostic practice. *Journal of Patient Experience*. Vol. 5(4). 267-271. DOI: 10.1177/2374373518755500

### Findings of the Study Vis-à-Vis the Objectives

| Objectives                                                                                                                                                                                | Findings                                                                                                                                                                                                                                                                                                                                                                                                                                                                             |
|-------------------------------------------------------------------------------------------------------------------------------------------------------------------------------------------|--------------------------------------------------------------------------------------------------------------------------------------------------------------------------------------------------------------------------------------------------------------------------------------------------------------------------------------------------------------------------------------------------------------------------------------------------------------------------------------|
| <p>i. What is the nature of patient safety culture protocols compliance among health workers and management of the Kwesimintsim Government Hospital in the Takoradi Municipality?</p>     | <ul style="list-style-type: none"> <li>• Findings revealed that policies, measures or strategies to promote patient safety culture in the health facility have not been prioritised thus resulting into poor patient safety culture compliance observed by respondents in this study.</li> <li>• Positive workplace culture was related to several desirable patient outcomes, such as fewer infections, reduced rates of mortalities and increased patient satisfaction.</li> </ul> |
| <p>ii. What is the prevalence of adverse events experienced and its effects among patients who attend the Kwesimintsim Government Hospital in the Takoradi Municipality?</p>              | <ul style="list-style-type: none"> <li>• Wrong prescription or surgeries can result into patients paying extra money to rectify these problems at the same health facility or elsewhere.</li> <li>• Wrong medication could cause some of the respondents to suffer from worsening health conditions and contraction of chronic health conditions due to delayed healthcare or risky drug interactions with the body.</li> </ul>                                                      |
| <p>iii. What is the impact of patient safety culture experienced on patient satisfaction among patients who attend the Kwesimintsim Government Hospital in the Takoradi Municipality?</p> | <ul style="list-style-type: none"> <li>• The high level of dissatisfaction with care received at the health facility could be related to 38% of the respondents who were unemployed and hence could not have the financial capacity to pay for extra medication, injection or hospitalisation associated through the effects of adverse events such as increased cost for new medications, injection or charges for unintended or extra hospitalisations.</li> </ul>                 |



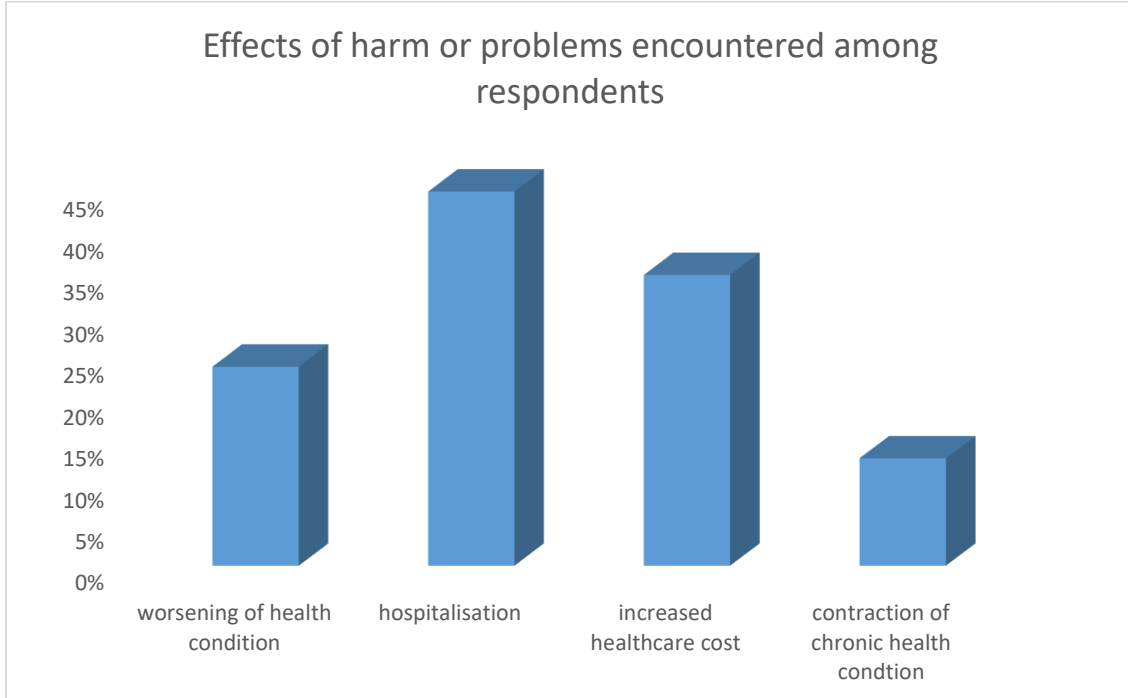

**Figure 1: Effects of harm or problems encountered among respondents**  
**Source: Field Survey, September (2022).**

Peer review only

1  
2  
3  
4  
5  
6  
7  
8  
9  
10  
11  
12  
13  
14  
15  
16  
17  
18  
19  
20  
21  
22  
23  
24  
25  
26  
27  
28  
29  
30  
31  
32  
33  
34  
35  
36  
37  
38  
39  
40  
41  
42  
43  
44  
45  
46  
47  
48  
49  
50  
51  
52  
53  
54  
55  
56  
57  
58  
59  
60

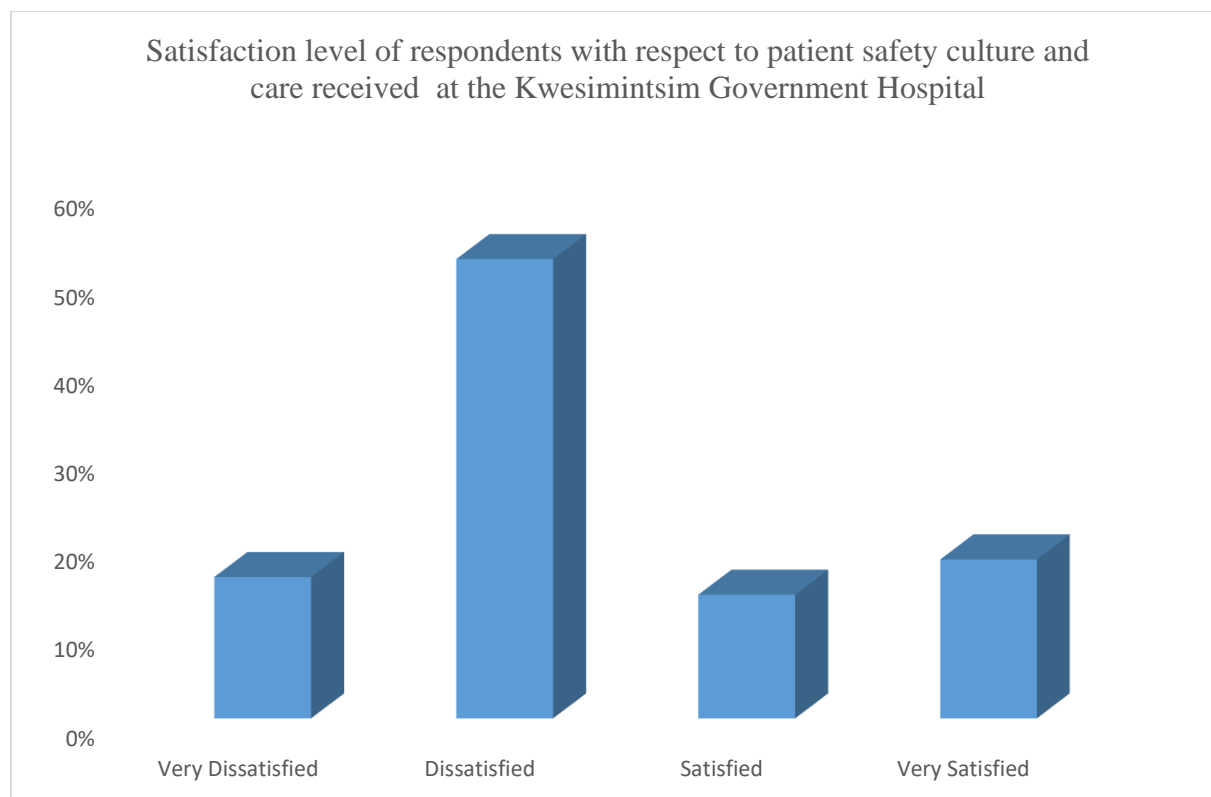

27  
28 **Figure 2: Level of satisfaction with patient safety protocols and care received among the**  
29 **respondents**  
30 **Source: Field Survey, September (2022).**

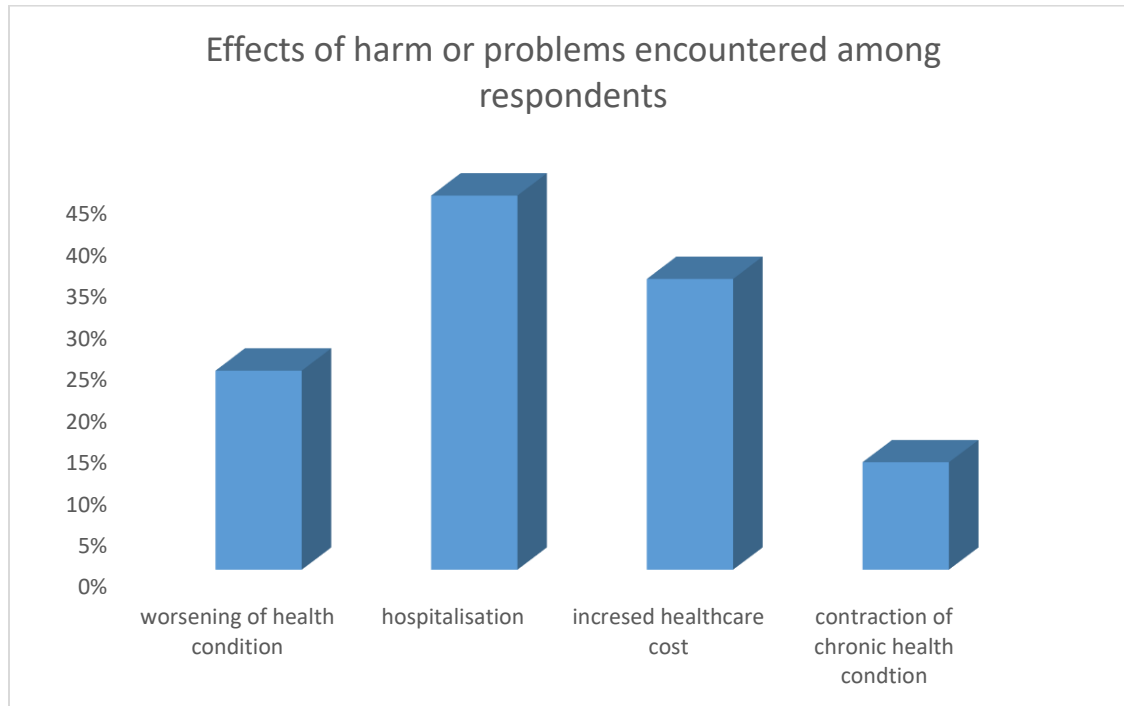

26  
27  
28  
29

**Figure 1: Effects of harm or problems encountered among respondents**  
**Source: Field Survey, September (2022).**

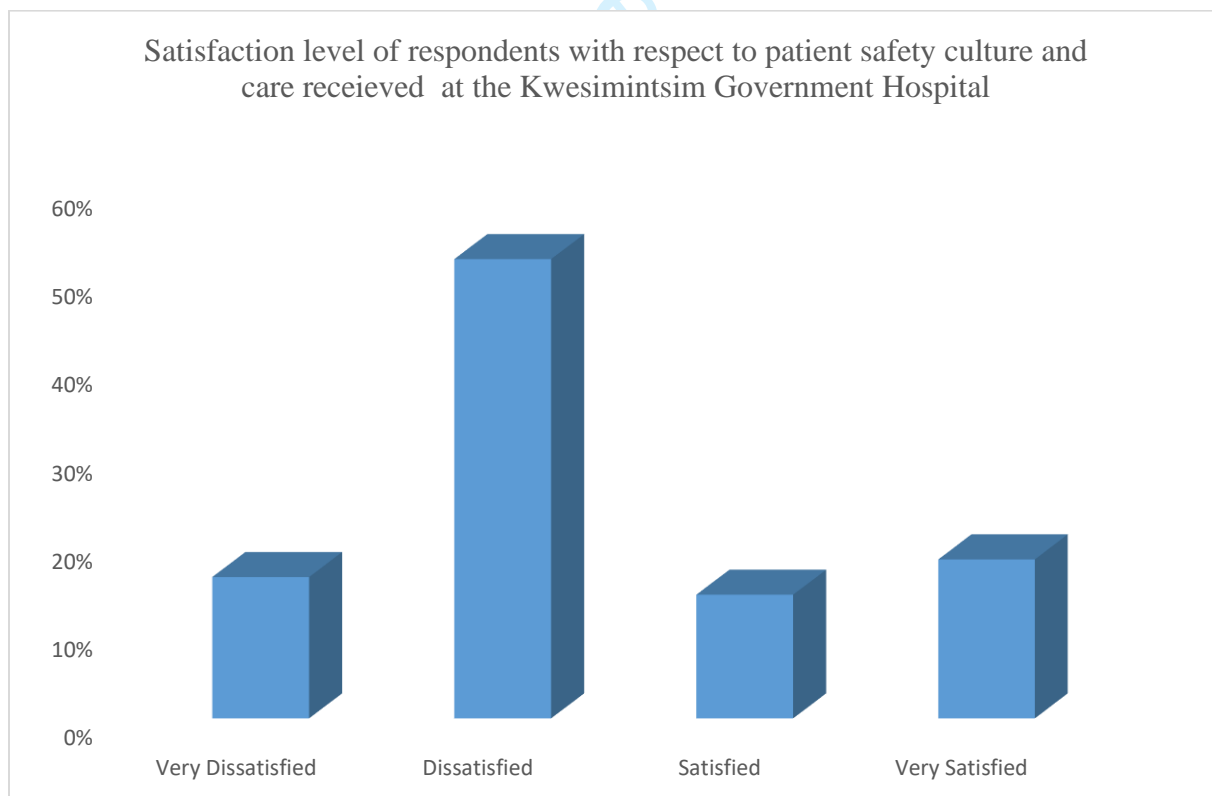

55  
56  
57  
58  
59  
60

**Figure 2: Level of satisfaction with patient safety protocols and care received among the respondents**  
**Source: Field Survey, September (2022).**

1  
2  
3 I have looked through the reporting checklists on the Equator Network, I am not able to find one  
4 appropriate to this type of study, and so I have not been able to upload a checklist on submission  
5 of the manuscript. The checklist in the Equator Network was for qualitative study but not for  
6 quantitative research. So, what is the way forward?  
7  
8  
9  
10  
11  
12  
13  
14  
15  
16  
17  
18  
19  
20  
21  
22  
23  
24  
25  
26  
27  
28  
29  
30  
31  
32  
33  
34  
35  
36  
37  
38  
39  
40  
41  
42  
43  
44  
45  
46  
47  
48  
49  
50  
51  
52  
53  
54  
55  
56  
57  
58  
59  
60

For peer review only

# BMJ Open

## PATIENT SAFETY CULTURE AND SATISFACTION IN GHANA: A FACILITY-BASED CROSS-SECTIONAL STUDY

|                                 |                                                                                                                                                                                                                                                                                                                                                                                                                                                                                                                                                                                                                                                                                                                                                                                                                                                                                                                                                             |
|---------------------------------|-------------------------------------------------------------------------------------------------------------------------------------------------------------------------------------------------------------------------------------------------------------------------------------------------------------------------------------------------------------------------------------------------------------------------------------------------------------------------------------------------------------------------------------------------------------------------------------------------------------------------------------------------------------------------------------------------------------------------------------------------------------------------------------------------------------------------------------------------------------------------------------------------------------------------------------------------------------|
| Journal:                        | <i>BMJ Open</i>                                                                                                                                                                                                                                                                                                                                                                                                                                                                                                                                                                                                                                                                                                                                                                                                                                                                                                                                             |
| Manuscript ID                   | bmjopen-2023-073190.R1                                                                                                                                                                                                                                                                                                                                                                                                                                                                                                                                                                                                                                                                                                                                                                                                                                                                                                                                      |
| Article Type:                   | Original research                                                                                                                                                                                                                                                                                                                                                                                                                                                                                                                                                                                                                                                                                                                                                                                                                                                                                                                                           |
| Date Submitted by the Author:   | 12-Oct-2023                                                                                                                                                                                                                                                                                                                                                                                                                                                                                                                                                                                                                                                                                                                                                                                                                                                                                                                                                 |
| Complete List of Authors:       | Botchwey, Charles; University of Education Winneba, Health Administration and Education<br>Boateng, Agatha; University of Education Winneba, Health Administration and Education<br>Ahimah, Patricia; University of Education Winneba, Health Administration and Education<br>Acquah, Francis; University of Education Winneba, Health Administration and Education<br>Adoma, Prince; University of Education Winneba, Health Administration and Education<br>Kumah, Emmanuel; University of Education Winneba, Health Administration and Education<br>Boakye, Dorothy; University of Education Winneba, Health Administration and Education<br>Boahen, Ebenezer; University of Education Winneba, Health Administration and Education<br>Kruh, Vivian; University of Cape Coast College of Humanities and Legal Studies, Population and Health<br>Koomson, Joseph; University of Cape Coast College of Humanities and Legal Studies, Population and Health |
| <b>Primary Subject Heading</b>: | Health services research                                                                                                                                                                                                                                                                                                                                                                                                                                                                                                                                                                                                                                                                                                                                                                                                                                                                                                                                    |
| Secondary Subject Heading:      | Health services research, Health policy                                                                                                                                                                                                                                                                                                                                                                                                                                                                                                                                                                                                                                                                                                                                                                                                                                                                                                                     |
| Keywords:                       | Health policy < HEALTH SERVICES ADMINISTRATION & MANAGEMENT, Decision Making, Health Equity, Clinical governance < HEALTH SERVICES ADMINISTRATION & MANAGEMENT                                                                                                                                                                                                                                                                                                                                                                                                                                                                                                                                                                                                                                                                                                                                                                                              |
|                                 |                                                                                                                                                                                                                                                                                                                                                                                                                                                                                                                                                                                                                                                                                                                                                                                                                                                                                                                                                             |

SCHOLARONE™  
Manuscripts

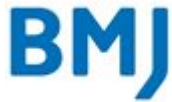

I, the Submitting Author has the right to grant and does grant on behalf of all authors of the Work (as defined in the below author licence), an exclusive licence and/or a non-exclusive licence for contributions from authors who are: i) UK Crown employees; ii) where BMJ has agreed a CC-BY licence shall apply, and/or iii) in accordance with the terms applicable for US Federal Government officers or employees acting as part of their official duties; on a worldwide, perpetual, irrevocable, royalty-free basis to BMJ Publishing Group Ltd ("BMJ") its licensees and where the relevant Journal is co-owned by BMJ to the co-owners of the Journal, to publish the Work in this journal and any other BMJ products and to exploit all rights, as set out in our [licence](#).

The Submitting Author accepts and understands that any supply made under these terms is made by BMJ to the Submitting Author unless you are acting as an employee on behalf of your employer or a postgraduate student of an affiliated institution which is paying any applicable article publishing charge ("APC") for Open Access articles. Where the Submitting Author wishes to make the Work available on an Open Access basis (and intends to pay the relevant APC), the terms of reuse of such Open Access shall be governed by a Creative Commons licence – details of these licences and which [Creative Commons](#) licence will apply to this Work are set out in our licence referred to above.

Other than as permitted in any relevant BMJ Author's Self Archiving Policies, I confirm this Work has not been accepted for publication elsewhere, is not being considered for publication elsewhere and does not duplicate material already published. I confirm all authors consent to publication of this Work and authorise the granting of this licence.

PATIENT SAFETY CULTURE AND SATISFACTION IN GHANA: A FACILITY-BASED CROSS-SECTIONAL STUDY

CHARLES OWUSU-ADUOMI BOTCHWEY<sup>1</sup>; AGARTHA AFFUL BOATENG<sup>2</sup>; PATRICIA OFORI AHIMAH<sup>3</sup>; FRANCIS ACQUAH<sup>4</sup>; PRINCE OWUSU ADOMA<sup>5</sup>; EMMANUEL KUMAH<sup>6</sup>; DOROTHY SERWAA BOAKYE<sup>7</sup>; EBENEZER ADDAE BOAHEN<sup>8</sup>; VIVIAN KRUIH<sup>9</sup> AND JOSEPH BOB KOW KOOMSON<sup>10</sup>

**Lead and Corresponding author:**

**Charles Owusu-Aduomi Botchwey, University of Education, Winneba, Faculty of Science Education, Department of Health Administration and Education, Post Office Box 25, Winneba, Central Region, Ghana. Email address: [chaboat08@yahoo.com](mailto:chaboat08@yahoo.com) Telephone Number: +233598014015**

**Information about the co-authors:**

1. **Charles Owusu-Aduomi Botchwey**, University of Education, Winneba, Faculty of Science Education, Department of Health Administration and Education, Post Office Box 25, Winneba, Central Region, Ghana.
2. **Agartha Afful Boateng**, University of Education, Winneba, Faculty of Science Education, Department of Health Administration and Education, Post Office Box 25, Winneba, Central Region, Ghana.
3. **Patricia Ofori Ahimah**, University of Education, Winneba, Faculty of Science Education, Department of Health Administration and Education, Post Office Box 25, Winneba, Central Region, Ghana.
4. **Francis Acquah**, University of Education, Winneba, Faculty of Science Education, Department of Health Administration and Education, Post Office Box 25, Winneba, Central Region, Ghana.
5. **Price Owusu Adoma**, University of Education, Winneba, Faculty of Science Education, Department of Health Administration and Education, Post Office Box 25, Winneba, Central Region, Ghana.
6. **Emmanuel Kumah**, University of Education, Winneba, Faculty of Science Education, Department of Health Administration and Education, Post Office Box 25, Winneba, Central Region, Ghana.
7. **Dorothy Serwaa Boakye**, University of Education, Winneba, Faculty of Science Education, Department of Health Administration and Education, Post Office Box 25, Winneba, Central Region, Ghana.
8. **Ebenezer Addae Boahen**, University of Education, Winneba, Faculty of Science Education, Department of Health Administration and Education, Post Office Box 25, Winneba, Central Region, Ghana.
9. **Vivian Kruh**, University of Cape Coast, College of Humanities and Legal Studies, Faculty of Social Sciences, Department of Population and Health, Cape Coast, Ghana.
10. **Joseph Bob Kow Koomson**, University of Cape Coast, College of Humanities and Legal Studies, Faculty of Social Sciences, Department of Population and Health, Cape Coast, Ghana.

## Abstract

**Background:** Globally, one of the measures of high performing healthcare facilities is the compliance of patient safety culture, which encompasses the ability of health institutions to avoid or drastically reduce patient harm or risks. These risks or harm is linked with numerous adverse patient outcomes such as medication error, infections, unsafe surgery and diagnosis error.

**Objectives:** The general objective of this study was to investigate into the impact of patient safety culture practices experienced on patient satisfaction among patients who attend the Kwesimintsim Government Hospital in the Takoradi Municipality.

**Methods:** This study was a descriptive cross-sectional study and a consecutive sampling technique was used to select 336 respondents for the study. Data was collected using a structured questionnaire and processed using Statistical Package for Social Sciences, version 21. Both descriptive and inferential statistics were carried out and result present using figures and tables.

**Results:** The study found that the overall patient safety compliance level observed by the respondents was poor (29.2%). The prevalence of adverse events experienced among the respondents was high (58%). The leading adverse events mentioned were medication errors, followed by wrong prescriptions and infections. The consequences of these adverse events encountered by the respondents were mentioned as increased healthcare costs (52%), followed by hospitalisation (43%), worsening of health conditions (41%), and contraction of chronic health conditions (22%). Patient safety cultural practices such as teamwork ( $\beta = 0.17$ ,  $p = 0.03$ ), response to error ( $\beta = 0.16$ ,  $p = 0.005$ ), communication openness ( $\beta = 0.17$ ,  $p = 0.003$ ), and handoffs and information exchange ( $\beta = 0.17$ ,  $p = 0.002$ ) were found to positively influence patient satisfaction.

**Conclusion:** The poor general compliance of the patient safety culture in the facility is unfortunate, and this can affect healthcare outcomes significantly. The study therefore entreats facility managers and various stakeholders to see patient safety care as an imperative approach to delivering quality essential healthcare and to act accordingly to create an environment that supports it.

**Keywords:** Patient satisfaction, Government, Prevalence, Hospitalisation and Prescription.

### ‘Strengths and limitations of this study’

#### Strengths of the Study

- The study ensured brevity in the construction of the study instrument.
- The cross-sectional study helped to describe the characteristics of the population under investigation.
- Parametric assumptions were met to ensure reliable results.
- A representative sample size was used.

#### Limitations of the Study

- The effect due to time was not captured due to the cross-sectional nature of the study design.
- Respondent responses may be exaggerated.
- The consecutive sampling technique could introduce biases in sampling.



## Background of the Study

Patient safety culture is an essential factor in determining the ability of hospitals to treat and reduce patient risks.<sup>1</sup> Patient safety is regarded as an international health concern affecting patients in various health care settings globally. This is due to the complexity of health care systems and the increase in unsafe care delivered to patients in various health institutions<sup>2, 3</sup>. The global healthcare landscape is said to be undergoing a transformative shift as health systems continue to operate within increasingly complex environments<sup>4</sup> driven by technology. Though fresh actions, emerging technologies and care models can have healing prospect, they can also trigger different dangers to safe care. Patient safety is a vital standard of health care and is now being acknowledged as a huge and rising global public health encounter. Worldwide determinations to decrease the affliction of patient harm have not accomplished considerable transformation over the previous one and half decades. As also highlighted by the World Health Organisation, unsafe care leading to adverse events is said to have the potential to be counted among the top 10 causes of death and disability worldwide<sup>5</sup> with associated annual cost amounting trillions<sup>6</sup>. It thus, indicate that patient safety during care is crucial in improving health in a long term.

Patient safety culture is an integrated pattern of individual and organisational behaviour. This is based upon shared beliefs and values that continuously seek to minimise the patient harm, which may result from the process of care delivery.<sup>3</sup> It is also referred to as the outcome of individual and organisation's values, attitudes, perceptions, competencies, and patterns of behaviour that determine the commitment to, and the style and proficiency of, an organisation's health and safety management<sup>7</sup>.

1  
2  
3 All these could be achieved through setting up clear policies, having skilled healthcare  
4 professionals, all-level leadership, up-to-date data, and patient-centered care in order to maintain  
5 healthcare safety sustainability.<sup>3</sup> Several studies stress the importance of patient safety culture for  
6 patient safety processes and outcomes.<sup>8</sup> More specifically, research has shown that a sound patient  
7 safety culture is associated with fewer adverse events<sup>9</sup> and more positive patient experiences.<sup>10</sup>

8  
9  
10 A systematic review by<sup>8</sup> found that a positive workplace culture was related to several desirable  
11 patient outcomes, such as fewer infections, reduced rates of mortalities and increased patient  
12 satisfaction. Studies have also shown that promoting patient safety culture among healthcare  
13 providers is a key to reducing adverse events and maintaining quality of care.<sup>11</sup>

14  
15  
16 Adverse events also known as medical errors are one of the numerous factors that affect patient  
17 safety within health facilities. Adverse events are ‘unintended injuries or complications that are  
18 caused by health care management rather than by the patient’s underlying disease. These can lead  
19 to death, disability at the time of discharge and prolonged hospital stay.<sup>12</sup> Adverse events or  
20 medical errors that significantly contribute to unsafe care and harm to patients which subsequently  
21 affect patient safety are medication errors, nosocomial infections, unsafe surgeries, wrong  
22 injections, procedures, and diagnostic errors.<sup>13</sup> The prevalence of adverse events by medical  
23 professionals has been alarming.

24  
25  
26 In Iran, a review study revealed that the prevalence of adverse events exists between 10 and 80%.<sup>14</sup>  
27 Another study conducted on the prevalence of adverse events revealed that about 7 out of 10  
28 selected professional nurses declared engaging in adverse events resulting in harm to patients.<sup>15</sup>

29  
30  
31 Measures taken to improve upon patient safety have demonstrated different levels of  
32 effectiveness.<sup>16</sup> Moreover, several prior studies conducted among medical staff have shown that

1  
2  
3 higher levels of awareness of patient safety culture are associated with higher patient overall  
4 satisfaction and lower occurrence of adverse events.<sup>17,18</sup> In Ghana, the vital points acknowledged  
5  
6 in the patient safety situational exploration were knowledge and learning in patient safety while  
7  
8 patient safety surveillance was the frailest act identified. There were also flaws in areas such as  
9  
10 national patient policy, healthcare related infections, surgical safety, patient safety partnerships  
11  
12 and patient safety funding, respectively<sup>19</sup>. It is against this background that the researchers seek to  
13  
14 investigate into patient safety culture among patients and its impact on their overall satisfaction of  
15  
16 care received at the Kwesimintim Government Hospital in the Takoradi Municipality of Ghana.  
17  
18  
19  
20  
21

## 22 **Objective**

23  
24  
25  
26 The general objective of this study is to investigate the impact of patient safety culture experienced  
27  
28 on patient satisfaction among patients who attend the Kwesimintim Government Hospital  
29  
30 Takoradi. Specifically, this study sought to: (a) assess patient safety culture protocol compliance  
31  
32 at Kwesimintim Government Hospital, Takoradi Municipality (b) measure the prevalence of  
33  
34 adverse events of patient safety culture protocols compliance and their effects on patients safety  
35  
36 among patients who attend Kwesimintim Government Hospital, Takoradi and (c) determine the  
37  
38 impact of patient safety culture practises on patient satisfaction among patients who attend the  
39  
40 Kwesimintim Government Hospital, Takoradi.  
41  
42  
43  
44  
45

## 46 **Methods**

47  
48 This study deployed a facility-based cross-sectional study design using a quantitative approach to  
49  
50 obtain the necessary data required for the accomplishment of the study. This design and approach  
51  
52 to research focuses on carefully measuring a set of variables to answer theory-guided research  
53  
54 questions or hypotheses<sup>20</sup>. The study was conducted at Kwesimintim Government Hospital  
55  
56  
57  
58  
59  
60

1  
2  
3 because of its strategic location and the numerous communities it serves. The Kwesimintsim  
4  
5 Government Hospital was selected due to its size, as well as the number of communities it serves.  
6  
7

8  
9 The Kwesimintsim Government Hospital is the district hospital for the Effia-Kwesimintsim  
10  
11 Municipal Assembly in Ghana. It is the referral point for an estimated population of 89,342 and  
12  
13 the second major referral health facility in Takoradi. The hospital was established in the year 1977,  
14  
15 was expected to cater for the healthcare needs of the communities in, and around the Kwesimintsim  
16  
17 municipality but the facility is now serving the communities beyond its catchment area including  
18  
19 Ahanta West, Mpohor, Wassa East and the Tarkwa Nsuaem Districts. The hospital supervises  
20  
21 other health institutions (both private and public) within the Kwesimintsim sub-metro. The sub-  
22  
23 districts are West Tanokrom, Lagos town, Sawmill, Kwesimintsim town, Kwesimintsim Zongo,  
24  
25 Anaji and Apramdo.  
26  
27  
28

29  
30 A 5-member management team made up of the Medical Superintendent, Health Service  
31  
32 Administrator, the Head of Nursing, the Head of Pharmacy and the Head of Finance guides the  
33  
34 operations of the hospital. There are also a number of operational committees, which help in the  
35  
36 management of the hospital. They include the Disciplinary Committee, the Audit Committee, the  
37  
38 Welfare Committee, the Entity Tender Committee, and Data Validation Committee among  
39  
40 others.<sup>21</sup>  
41  
42  
43  
44

45  
46 The target population for this study encompassed all individuals seeking healthcare services at the  
47  
48 Kwesimintsim Government Hospital in Ghana. Therefore, the estimated number of 89,342 patients  
49  
50 served by the facility was considered as the size of the target population. The assumptions of using  
51  
52 Yamane's<sup>22</sup> sampling formula to compute the sampling size was based on a 95% confidence  
53  
54 interval, and 5% margin of error. To achieve a statistical power of 0.9 and at an alpha level of 0.05,  
55  
56 the study computed the sampling size as follows:  $n = \frac{N}{1 + N(e^2)}$ ,  
57  
58  
59  
60

Where  $n$  is the sample size,  $N$  is the study population size for the proposed period of data collection and  $e$  is the level of precision. The study population ( $N$ ) for this study is presumed to be 89,342.

The level of precision ( $e$ ) is 0.05 (95% confidence interval).

$$n = \frac{89,342}{1 + 89,342(0.05^2)}$$

$$n = \frac{89,342}{1 + 89,342(0.0025)}$$

$$n = \frac{89,342}{1 + 223.355}$$

$$n = \frac{89,342}{224.355}$$

$$n = 398.23$$

Therefore, 398 was the estimated sample size for the study.

Consecutive sampling method whereby every eligible and available participant was recruited until the desired sample size was reached based on the inclusion criteria applied in this study. This method was appropriate for the study because of the ill-health conditions of patients, which often made some of them not fit or ready for data collection. The study recruited patients who visited the hospital during the data collection period. To ensure ethical compliance, prior to their participation, all patients involved in the study provided informed consent by signing the consent form. Additionally, the hospital granted its approval for the study. The study excluded inpatients admitted to the hospital due to their perceived inability due to ill-health (i.e., inability to perhaps not provide accurate responses).

Structured (closed and open-ended) questionnaire was used to collect data from the sampled respondents. The questionnaire was self-administered and a high level of discretion was kept to protect the identities and views of the respondents. The questionnaire was made up of four parts.

1  
2  
3 The first part interrogated the respondents on their demographic data. The second part interrogated  
4 the respondents on the compliance of patient safety culture protocols witnessed in the facility. The  
5 third part interrogated the respondents on adverse events they have experienced in the health  
6 facility and their consequences on them. The final part of the questionnaire interrogated the  
7 respondents on their satisfaction regarding patient safety culture practices witnessed and care  
8 received at the health facility.  
9

10  
11 In order to ensure the validity of the content of the questionnaires, they were given to two experts  
12 who understood the topic under investigation to comment and add their input. The patient safety  
13 practices were adapted from<sup>23</sup>. The study used single-item measures for the variables used in the  
14 inferential statistics because of brevity and the need to assess several constructs<sup>24</sup>; hence, there was  
15 no need to carry out construct validity analyses such as confirmatory factor analysis and others.  
16 Nevertheless, various tests needed to confirm parametric assumptions such as normality,  
17 homogeneity of variance, and multicollinearity, among others, to ensure reliable estimation were  
18 carried out and met before the main inferential analysis of interest was carried out.  
19

20  
21 Data obtained from the study were entered into a Microsoft Excel spreadsheet and imported into  
22 SPSS computational tool (version 22) to generate the study findings. Both descriptive and  
23 inferential statistics were carried out and result visualized using tables and figures. The study was  
24 conducted between 2nd September, 2022 and 30th June, 2023 and achieved a response rate of  
25 84%.  
26  
27

### 28 **Patient and public involvement**

29  
30 Patients and the public's involvement was encountered during the gap identification stage, the  
31 questionnaire design stage, and the data collection stage. The areas to be explored and wording of  
32 items were discussed with randomly selected patients prior to the data collection, and their output  
33 was considered during the final design of the questionnaire. The facility engagement resulted in  
34  
35  
36  
37  
38  
39  
40  
41  
42  
43  
44  
45

1  
2  
3 the approval of the study and the nomination of staff to assist in the data collection process. The  
4 authors also intend to disseminate the published results of the study to the public through a seminar  
5 at the hospital and various community communication channels.  
6  
7

### 8 9 **Data sharing statement**

10  
11 Authors want to state that the data for this study would be made available upon a written request.  
12

## 13 **Presentation of Results**

### 14 15 **Demographic Characteristics of the Respondents**

16  
17 In all, three hundred and thirty-six (336) respondents responded to the study. More than half of the  
18 respondents (n=212, 63%) were females and males constituted 37% of the respondents (n=124).  
19  
20 More than half of the respondents were aged 31-40 years (n=181, 54%), followed by respondents  
21 aged 21-30 years (n=121, 36%), followed by respondents aged 41 years and over (n=24, 7%) and  
22 less than a quarter (n=10, 3%) were aged 16-20 years. An overwhelming majority of the  
23 respondents were Christians (n=319, 95%) and the remaining few were Muslims (n=17, 5%).  
24  
25 Majority of the respondents were single in terms of marital status (n=212) denoting 63% of the  
26 respondents, a little over one-fourth were married (n=94, 28%) and almost one out of every 10  
27 respondents was a divorcee (n=30, 9%). With respect to the educational qualification of the 336  
28 respondents, almost half of them were basic school and Senior High School graduates (n=155,  
29 46%), followed by respondents with no formal education (n=19, 6%) and very minute portion of  
30 the respondents (n=7, 2%) were University graduates. With regards to the employment category  
31 of the respondents, almost half of them were self-employed (n=165, 49%), followed by more than  
32 one-third who were unemployed (n=128, 38%), followed by students who were 27 in number  
33 (8%), followed by respondents who were private-sector employees (n=13, 4%) and only 1 of the  
34 respondents (1%) was a government-employee. **Table 1** summarises the demographic  
35 characteristics of the respondents.  
36  
37  
38  
39  
40  
41  
42  
43  
44  
45  
46  
47  
48  
49  
50  
51  
52  
53  
54  
55  
56  
57  
58  
59  
60

**Table 1: Demographic characteristics of the respondents.**

| Characteristics           | Frequency | Percentage (%) |
|---------------------------|-----------|----------------|
| Gender                    |           |                |
| Females                   | 124       | 36.90          |
| Males                     | 212       | 63.10          |
| Age                       |           |                |
| 16-20                     | 10        | 2.98           |
| 21-30                     | 121       | 36.01          |
| 31-40                     | 181       | 53.87          |
| 41 and over               | 24        | 7.14           |
| Marital                   |           |                |
| Single                    | 212       | 63.10          |
| Married                   | 94        | 27.98          |
| Divorced                  | 30        | 8.93           |
| Religion                  |           |                |
| Christians                | 319       | 94.94          |
| Muslims                   | 17        | 5.06           |
| Employment category       |           |                |
| Unemployed                | 128       | 38.10          |
| Government employee       | 3         | 0.89           |
| Private-sector employee   | 13        | 3.87           |
| Self-employed             | 165       | 49.11          |
| Student                   | 27        | 8.04           |
| Educational qualification |           |                |
| No formal education       | 19        | 5.65           |
| Basic education           | 155       | 46.13          |
| Secondary education       | 155       | 46.13          |
| Bachelor's degree         | 7         | 2.08           |

### **Patient safety culture protocols compliance**

The first objective of the study was to assess patient safety culture protocols compliance by health workers and management of the Kwesimintsim Government Hospital in the Takoradi Municipality from the perspectives of patients. The study presented 13 patient safety protocols statements for which the respondents (patients) were asked to state if each of the protocols were observed by staff and management of the health facility. The overall score for compliance was computed through



evaluating the mean score of the protocols investigated. The overall safety protocol compliance level was found to be very abysmal (29.2%) in this study. **Table 2** presents these findings.

**Table 2: Patient safety culture protocols compliance.**

| Safety Protocols                                                                     | Frequency of yes responses (N = 336) | Percentage (%) |
|--------------------------------------------------------------------------------------|--------------------------------------|----------------|
| When one unit gets busy, other health workers help.                                  | 306                                  | 91.1           |
| Staff actively do things to improve patient safety.                                  | 115                                  | 34.2           |
| Hospital units work well together to provide the best care for patients.             | 245                                  | 72.9           |
| Hospital management provides a work climate that promotes patient safety.            | 175                                  | 52.1           |
| The actions of hospital management show that patient safety is a top priority.       | 160                                  | 47.6           |
| Important patient care information is often not lost among staff.                    | 199                                  | 59.2           |
| Problems do not often occur in the exchange of information across the units.         | 44                                   | 13.1           |
| Patient safety is never sacrificed to get work done.                                 | 30                                   | 8.9            |
| The procedures and systems at the facility are good at preventing errors.            | 0                                    | 0              |
| Staff freely speak up if they see something that may negatively affect patient care. | 0                                    | 0              |
| Staff feel free to question the decisions of those with more authority.              | 0                                    | 0              |
| Staff are not afraid to ask questions when something does not seem right.            | 0                                    | 0              |
| Staff report any error they make to promote patient safety.                          | 3                                    | 0.9            |
| <b>Overall average compliance rate (%)</b>                                           |                                      | <b>29.2</b>    |

N= total number of respondents

### **Prevalence of adverse events of patient safety culture protocols compliance and their effects on patient's safety**

To assess the adverse events of patient safety culture protocols compliance, respondent were asked to indicate whether they have encountered harm or problem as a result of care received at the facility for the past three years. As in **Fig 1**, 195 representing 58% of the respondents indicated

that they have incurred harm before as a result of care received at the facility for the past three years. A chi-square test was then run to evaluate whether there was an association between gender and harm experienced, but the result turned out to be insignificant ( $\chi^2(1) = 0.14, p = 0.711$ ). See Figure 1 in appendix.

The study further asked those who indicated that they have experience harm before as a result of care received to identify or associate the possible harm received or problem encountered across a list of problems or harm. Medical error followed by wrong prescription and infections were found to be the most problems or harm encountered as a result of none adherence to patient safety culture protocol compliance as detailed in **Table 3**.

**Table 3: Harms or Problems encountered as a result of none adherence to patient safety culture protocol compliance.**

| Problems/Harms encountered | Frequency (N=195) | Percentage (%) |
|----------------------------|-------------------|----------------|
| Medication error           | 105               | 53.8           |
| Infections                 | 96                | 49.2           |
| Unsafe surgery             | 21                | 10.8           |
| Diagnosis error            | 86                | 46.1           |
| Wrong injection            | 45                | 23.1           |
| Wrong treatment procedure  | 91                | 46.7           |
| Wrong prescription         | 101               | 51.8           |

N = number of people who indicated they have experience problem or harm in the cause of receiving care.

Respondent were again asked to indicate the effect such problems or harm encountered at the facility yields to. Increasing of health expenditure (n = 102) followed by hospitalization (n = 83) and worsening of health condition (n = 80) were the popular effect mentioned as shown in **Fig 2**. See Figure 2 in appendix.

### Inferential Statistics

The final objective of this study was to determine the impact of patient safety culture practices on patient satisfaction. The study established this through regression analysis. Before undertaking such analysis certain assumptions were very crucial to be met in order to product accurate and robust results. The first assumption to be explored was multicollinearity. **Table 4** shows the correlation matrix between the dependent and independent variables. The result of the correlations

was examined using the Holm correction to adjust for multiple comparisons based on an alpha value of .05. It could be observed that there is no multicollinearity present as no correlation value exceed 0.5.

**Table 4: Correlation between the independent and dependent variables**

| Variable                             | 1    | 2     | 3     | 4     | 5     | 6    | 7    | 8 |
|--------------------------------------|------|-------|-------|-------|-------|------|------|---|
| 1. Satisfaction                      | -    |       |       |       |       |      |      |   |
| 2. Frequency of event reported       | 0.02 | -     |       |       |       |      |      |   |
| 3. Teamwork                          | .17* | 0.06  | -     |       |       |      |      |   |
| 4. Response to error                 | 0.11 | -0.05 | .19*  | -     |       |      |      |   |
| 5. Communication openness            | .19* | -0.12 | .17*  | -0.12 | -     |      |      |   |
| 6. Management support                | 0.03 | 0.1   | -0.16 | -0.12 | 0.02  | -    |      |   |
| 7. Handoffs and information exchange | 0.13 | 0.1   | -0.09 | -.28* | -0.03 | .23* | -    |   |
| 8. Staffing                          | .17* | -.23* | 0.11  | -0.05 | .24*  | 0    | 0.11 | - |

Note. \* *p* value is significant

The normality assumption was explored with the Q-Q plot, and the result did not deviate much from normality; besides, the sample size was even greater enough to evoke the central limit theorem. Studentized residuals plot for outlier detection was explored and there was no presence of outlier. The assumption of homoscedasticity was tested using the Breusch-Pagan the result turns to be insignificant indicating homoscedasticity. We attached all these assumption analysis as an appendix. Following the satisfactory fulfillment of these crucial parametric assumptions, we conducted the regression analysis. As indicated in Table 5, the regression model exhibited statistical significance, as evidenced by the F-statistic and R-square values ( $F(7,325) = 5.71, p < .001, R^2 = .11$ ).

**Table 5: Model Fit Measures**

|  | Overall Model Test |
|--|--------------------|
|--|--------------------|

| <b>R</b> | <b>R<sup>2</sup></b> | <b>F</b> | <b>df1</b> | <b>df2</b> | <b>p</b> |
|----------|----------------------|----------|------------|------------|----------|
| 0.331    | 0.11                 | 5.71     | 7          | 325        | <.001    |

From the regression output (see Table 6), it is established again that there is no presence of multicollinearity looking at the variance inflation factor (VIF) across all the independent variable indicating some level of confidence in the regression output. From the regression output, it is observed that teamwork ( $\beta = 0.17$ ,  $p = 0.03$ ), response to error ( $\beta = 0.16$ ,  $p = 0.005$ ), communication openness ( $\beta = 0.17$ ,  $p = 0.003$ ) and Handoffs and information exchange ( $\beta = 0.17$ ,  $p = 0.002$ ) all significantly predict patient satisfaction. Management support, frequency of event reported and staffing did not however significant predict patient satisfaction at the selected significant level of 0.05.

**Table 6: Results for Linear Regression with Frequency event reported, Teamwork, Response to error, Communication openness, Management support, Handoffs and information exchange, and Staffing predicting patient Satisfaction**

| Variable                          | B     | SE   | 95.00% CI      | $\beta$ | t    | p     | VIF  |
|-----------------------------------|-------|------|----------------|---------|------|-------|------|
| (Intercept)                       | 0.46  | 0.36 | [-0.25, 1.18]  | 0       | 1.27 | 0.206 |      |
| Frequency of event reported       | 0.006 | 0.04 | [-0.07, 0.08]  | 0.008   | 0.15 | 0.88  | 1.1  |
| Teamwork                          | 0.04  | 0.02 | [0.004, 0.07]  | 0.12    | 2.16 | 0.031 | 1.13 |
| Response to error                 | 0.11  | 0.04 | [0.03, 0.18]   | 0.16    | 2.85 | 0.005 | 1.15 |
| Communication openness            | 0.17  | 0.06 | [0.06, 0.28]   | 0.17    | 3    | 0.003 | 1.12 |
| Management support                | 0.02  | 0.04 | [-0.07, 0.10]  | 0.02    | 0.4  | 0.686 | 1.09 |
| Handoffs and information exchange | 0.13  | 0.04 | [0.05, 0.21]   | 0.17    | 3.07 | 0.002 | 1.17 |
| Staffing                          | 0.08  | 0.04 | [-0.005, 0.16] | 0.1     | 1.85 | 0.065 | 1.15 |

## Discussion

This study sought to assess patient safety culture compliance, determine the prevalence of adverse events related to patient safety culture protocols and their effects, and evaluate the impact of patient safety culture practices on patient satisfaction.

Patient safety culture compliance has become the sine qua non approach to delivering healthcare that does not only minimise medical errors but also captures the responsiveness of a healthcare system entrenched in meeting patient's frivolous expectations. The World Health Organisation recognised patient safety-centred care as the pivotal foundation for delivering quality essential health services<sup>3</sup>. It is unfortunate that the study's findings on safety culture compliance overall estimation was not that appreciable (29.2% adherence rate) and therefore seems to support the existing evidence.<sup>5, 14, 15</sup> On the other hand, it is not surprising to observe this outcome given the study setting. Reports from the Media in Ghana have consistently highlighted how patients are taken for granted especially in government healthcare facilities. This ill safety culture compliance could be attributed to several factors. Medical negligence on the part of the healthcare profession as documented in the country<sup>25</sup>, poor facility management and supervision<sup>3</sup>, infrastructure and technological limitation among others. Infrastructure and appropriate technology to meet the needs of the population who are constantly seeking care is a deficit or limitation for almost every Ghanaian government healthcare facility. Even so, poor management and supervision may be the most plausible factor for the ill patient safety culture compliance among professionals since it is common to observe government institutions, including healthcare facilities, being operational but lacking effective management. Public workers often prioritize their monthly remuneration over the quality and quantity of their output, in contrast to their counterparts in the private sector. Facility managers and leaders could do better in ensuring proper supervision.

The reported ill patient safety culture compliance among professionals in the study collides with the resulting significant number of people (58% of the respondents) who claim to have experienced harm or problems due to receiving care at the facility. This finding outcome was also in consistence with the finding of some existing studies where prevalence of adverse events was estimated from 10 to 80%.<sup>14,15</sup> Medical errors, wrong prescription, infections and hospitalization mentioned in

1  
2  
3 literature as being part of the problem or harm often encountered when receiving care<sup>13</sup> is also  
4 highlighted in the study. Hygienic practices in most Ghanaian healthcare facilities are not up to  
5 standard even at the top resourced tertiary facilities and so the infection rate reported in the study  
6 may not be over-estimated. With several trained professional teachers in the country (Ghana) who  
7 cannot spell correctly basic daily words and write clearly<sup>26</sup>, it is not unlikely that their counterpart  
8 (trained nurses) who administer medication and some instances prescribe medications (even  
9 though not certified for prescribing drugs) together with trained medical doctors offer or lure  
10 patients into getting wrong medications as observed in the study.  
11  
12  
13  
14  
15  
16  
17

18 Such anomaly (patient harm) in healthcare delivery most often elongate time and resource spent  
19 in seeking care, and so increasing of healthcare cost as the leading effect of this anomaly captured  
20 by the study was not unexpected. It is estimated that the aggregate costs of patient harm amount  
21 to trillions of dollars each year<sup>6</sup>. With a significant number of people in Ghana living below the  
22 poverty line<sup>27</sup>, this could jeopardise people's willingness to seek appropriate healthcare.  
23 Hospitalisation and worsening of healthcare conditions as a result of adverse events in patient  
24 safety culture protocols and compliance rates in the study are also concerning. If the attempt to  
25 seek healthcare is perceived to be accompanied with a new and deteriorating health condition, then  
26 a rational being would desist from making such attempts. The consequent effect may include  
27 routine self-medication and a delay in seeking appropriate healthcare services.  
28  
29  
30  
31  
32  
33  
34  
35

36 The study's last objective was to evaluate the impact of patient safety culture practices on patient  
37 satisfaction in the Ghanaian context since the two have been found to be associated with each  
38 other<sup>8,11</sup>. The study found four key patient safety practices that predicts patient satisfaction  
39 including teamwork, responsiveness to error, communication openness and handoffs and  
40 information exchange. If patient sees professional working as a team by supporting each other in  
41 addressing their healthcare needs, then they are likely to feel welcome to the facility and appreciate  
42 the healthcare professionals' efforts either than each professional appearing to be working on a  
43 function and tossing patients around without effective coordination. Moreover, if professionals are  
44 found admitting their limitations as human when they encounter them, a certain level of trust would  
45 be built and hence improve patient-professional relationship and the same argument holds for  
46 effective exchange of information and openness to communication. All of these would go a long  
47 way of reducing adverse events and ensuring some level of quality of care<sup>11</sup>. These practices do  
48  
49  
50  
51  
52  
53  
54  
55  
56  
57  
58  
59  
60

1  
2  
3 not require hard or external resources, hence constant training of healthcare professional on these  
4 patient safety culture practices with effective management and supervision thereafter could play a  
5 major in creating a healthcare atmosphere that thrives on patient safety culture.  
6  
7

8  
9 The findings of this study identify a possible gap in patient safety care in the Ghanaian public  
10 healthcare system and recognise managers and leaders of the various healthcare facilities as  
11 catalysts to stimulate an atmosphere that supports patient safety-centred care given the forever  
12 anticipated limited available healthcare resources.  
13  
14  
15

## 16 17 **Conclusion**

18  
19 One of the hallmarks of modern healthcare institutions is the compliance of patient safety-centered  
20 care. This approach to healthcare delivery exposes patients to less risks and harm at the health  
21 facilities. The study however identified poor patient safety care and associated harms and effect.  
22  
23 The study also identified teamwork, effective communication and free exchange of information as  
24 having a positive impact on patient satisfaction. The study therefore entreats facility managers and  
25 various stakeholders to see patient safety care as an imperative approach to delivering quality  
26 essential healthcare services and monitor and implement novel interventions to promote and  
27 sustain patient safety protocol compliance in their respective settings.  
28  
29  
30  
31  
32  
33  
34  
35  
36  
37

## 38 **Study Limitations**

39  
40  
41 Just as in any empirical study, this particular inquiry is likewise susceptible to various  
42 methodological constraints, albeit concerted efforts were exerted to mitigate a subset of these  
43 limitations. The study used a cross-sectional survey, implying that changes due to time were not  
44 captured. The consecutive sampling technique deployed in the study also implies that several  
45 benefits of probabilistic sampling may not be attained. Finally, even though the sample size was  
46 adequate given the sampling technique and context of the study, including other facilities in the  
47 region with a larger sample size would have enriched the findings and allowed for comparative  
48 analysis. Given the aforementioned limitations, the study contends that it is pivotal and incumbent  
49 to undertake additional research endeavours as a means of procuring an enriched and holistic  
50  
51  
52  
53  
54  
55  
56  
57  
58  
59  
60



1  
2  
3 understanding of patient safety care. This includes the examination of supplementary secondary  
4 facilities pertaining to the topic at hand, thereby engendering a more all-encompassing  
5 apprehension of the topic's intricate dynamics nationwide. By encompassing other pertinent  
6 facilities within forthcoming investigations, a more expansive purview can be attained, resulting  
7 in heightened discernment and profound elucidation regarding patient safety care in Ghana.  
8  
9  
10  
11

## 12 13 **Funding**

14  
15 Authors declare that no funding was received  
16  
17

## 18 19 **References**

- 20  
21 1. Kakemam E, Albelbeisi AH, Davoodabadi S, Ghafari M, Dehghandar Z, Raeissi P. Patient  
22 safety culture in Iranian teaching hospitals: baseline assessment, opportunities for improvement  
23 and benchmarking. *BMC Health Services Research*. 2022 Mar 26;22(1):403. Available at:  
24 <https://doi.org/10.1186/s12913-022-07774-0>  
25  
26 2. Hamdan M, Saleem AA. Changes in patient safety culture in Palestinian public hospitals: impact  
27 of quality and patient safety initiatives and programs. *Journal of patient safety*. 2018 Sep  
28 1;14(3):e67-73. Available at:  
29 [https://journals.lww.com/journalpatientsafety/Abstract/2018/09000/Changes\\_in\\_Patient\\_Safety\\_Culture\\_in\\_Palestinian.21.aspx](https://journals.lww.com/journalpatientsafety/Abstract/2018/09000/Changes_in_Patient_Safety_Culture_in_Palestinian.21.aspx)  
30  
31  
32 3. World Health Organisation. Patient Safety, Key facts. 2019 September. [cited 2022 June 19].  
33 Available from: <https://www.who.int/news-room/fact-sheets/detail/patient-safety>  
34  
35  
36 4. Chatzi AV, Malliarou M. The need for a nursing specific patient safety definition, a viewpoint  
37 paper. *International Journal of Health Governance*. 2023 May 23;28(2):108-16. Available at:  
38 <https://www.emerald.com/insight/content/doi/10.1108/IJHG-12-2022-0110>  
39  
40  
41 5. Jha A. Patient safety—a grand challenge for healthcare professionals and policymakers alike.  
42 In Roundtable at the Grand Challenges Meeting of the Bill & Melinda Gates Foundation 2018 Oct.  
43  
44 6. Slawomirski L, Auraen A, Klazinga NS. The economics of patient safety: strengthening a  
45 value-based approach to reducing patient harm at national level. 2017 Mar. Available  
46 <https://www.oecd.org/els/health-systems/The-economics-of-patient-safety-March-2017.pdf>  
47  
48  
49 7. El-Sherbiny NA, Ibrahim EH, Abdel-Wahed WY. Assessment of patient safety culture among  
50 paramedical personnel at general and district hospitals, Fayoum Governorate, Egypt. *Journal of*  
51 *the Egyptian Public Health Association*. 2020 Dec;95:1-8. Available at:  
52 <https://doi.org/10.1186/s42506-019-0031-8>  
53  
54  
55  
56  
57  
58  
59

- 1  
2  
3  
4  
5  
6  
7  
8  
9  
10  
11  
12  
13  
14  
15  
16  
17  
18  
19  
20  
21  
22  
23  
24  
25  
26  
27  
28  
29  
30  
31  
32  
33  
34  
35  
36  
37  
38  
39  
40  
41  
42  
43  
44  
45  
46  
47  
48  
49  
50  
51  
52  
53  
54  
55  
56  
57  
58  
59  
60
8. Braithwaite J, Herkes J, Ludlow K, Testa L, Lamprell G. Association between organisational and workplace cultures, and patient outcomes: systematic review. *BMJ open*. 2017 Nov 1;7(11):e017708. Available at : <https://doi.org/10.1136/bmjopen-2017-017708>.
  9. Najjar S, Nafouri N, Vanhaecht K, Euwema M. The relationship between patient safety culture and adverse events: a study in Palestinian hospitals. *Safety in Health*. 2015 Dec;1:1-9. Available at: <https://doi.org/10.1186/s40886-015-0008-z>.
  10. Abrahamson K, Hass Z, Morgan K, Fulton B, Ramanujam R. The relationship between nurse-reported safety culture and the patient experience. *The Journal of nursing administration*. 2016 Dec 1;46(12):662-8. Available at: <https://www.jstor.org/stable/26813775>
  11. Sorra J, Gray L, Streagle S, et al. AHRQ Hospital Survey on Patient Safety Culture: User's Guide. (Prepared by Westat, under Contract No. HHS A290201300003C). AHRQ Publication No. 18-0036-EF (Replaces 04-0041, 15(16)-0049-EF). Rockville, MD: Agency for Healthcare Research and Quality. July 2018. Available at: <https://www.ahrq.gov/sops/quality-patient-safety/patientsafetyculture/hospital/index.html>
  12. Pertierra LR, Hughes KA, Vega GC, Olalla-Tárraga MÁ. High resolution spatial mapping of human footprint across Antarctica and its implications for the strategic conservation of avifauna. *PloS one*. 2017 Jan 13;12(1):e0168280. Available at: <https://journals.plos.org/plosone/article?id=10.1371/journal.pone.0168280>
  13. Ghasemi M, Khoshakhlagh AH, Mahmudi S, Fesharaki MG. Identification and assessment of medical errors in the triage area of an educational hospital using the SHERPA technique in Iran. *International Journal of Occupational Safety and Ergonomics*. 2015 Jul 3;21(3):382-90. Available at: <https://doi.org/10.1080/10803548.2015.1073431>
  14. Vaziri S, Fakouri F, Mirzaei M, Afsharian M, Azizi M, Arab-Zozani M. Prevalence of medical errors in Iran: a systematic review and meta-analysis. *BMC health services research*. 2019 Dec;19(1):1-1. Available at : <https://bmchealthservres.biomedcentral.com/articles/10.1186/s12913-019-4464-8>
  15. Kakemam E, Albelbeisi AH, Davoodabadi S, Azarmi M, Zolghadr F, Mamene M. The impact of nurses' perceptions of systems thinking on occurrence and reporting of adverse events: A cross-sectional study. *Journal of nursing management*. 2022 Mar;30(2):482-90. Available at: <https://onlinelibrary.wiley.com/doi/full/10.1111/jonm.13524>
  16. Donaldson L, Ricciardi W, Sheridan S, Tartaglia R. Textbook of patient safety and clinical risk management. 2021. Available at : <https://europepmc.org/books/n/spr9783030594039/?extid=36315766&src=med>
  17. Wang CH, Yen CD. Leadership and turnover intentions of Taiwan TV reporters: The moderating role of safety climate. *Asian Journal of Communication*. 2015 May 4;25(3):255-70. Available at: <https://www.tandfonline.com/doi/abs/10.1080/01292986.2014.960877>

- 1  
2  
3 18. Yesilyaprak T, Demir Korkmaz F. The relationship between surgical intensive care unit nurses' patient safety culture and adverse events. *Nursing in Critical Care*. 2023 Jan;28(1):63-71. Available at: <https://onlinelibrary.wiley.com/doi/full/10.1111/nicc.12611>
- 4  
5  
6  
7  
8 19. Otchi E, Bannerman C, Lartey S, Amoo K, Odame E. Patient safety situational analysis in Ghana. *Journal of Patient Safety and Risk Management*. 2018;23 (6):257-263. Available at: doi:[10.1177/2516043518806366](https://doi.org/10.1177/2516043518806366)
- 9  
10  
11  
12 20. Creswell JW, Creswell JD. *Research design: Qualitative, quantitative, and mixed methods approaches*. Sage publications; 2017 Nov 27.
- 13  
14  
15 21. Kwesimintsim Government Hospital. Health information records. 2021 June.
- 16  
17 22 Yamanae T. *Statistics: An Introductory Analysis*. London: John Weather Hill. 1973.
- 18  
19 23 Arabloo J, Rezapour A, EBADI FA, Mobasheri Y. Measuring patient safety culture in Iran using the Hospital survey on patient safety culture (HSOPS): an exploration of survey reliability and validity. 2012. Available at: [https://ijhr.iuums.ac.ir/article\\_3826.html](https://ijhr.iuums.ac.ir/article_3826.html)
- 20  
21  
22  
23 24. Drolet, A. L., & Morrison, D. G. (2001). Do we really need multiple-item measures in service research?. *Journal of service research*, 3(3), 196-204. Available at: <https://journals.sagepub.com/doi/abs/10.1177/109467050133001>
- 24  
25  
26  
27 25 . Bayuo J, Koduah AO. Pattern and outcomes of medical malpractice cases in Ghana: a systematic content analysis. *Ghana Medical Journal*. 2022 Dec 1;56(4):322-30. Available at: <https://www.ajol.info/index.php/gmj/article/view/237625>
- 28  
29  
30  
31  
32 26. EduCeleb. 83.5% fail Ghana's teachers licensure. 2023 June. [cited 2023 July 1]. Available at: <https://educeleb.com/83-5-fail-ghanas-teacher-licensure-exam/>
- 33  
34  
35  
36 27 Statista. International poverty rate in Ghana from 2017 to 2022. 2022. [cited 2023 June 29]. Available at: <https://www.statista.com/statistics/1222084/international-poverty-rate-in-ghana/>
- 37  
38  
39  
40

## 41 **Figure legends**

42  
43  
44 **Figure 1: Prevalence of adverse events of patient safety culture protocols compliance**

45  
46 **Figure 2: Effect of harms or problems encountered as a result of none adherence to patient safety culture protocol compliance**

47  
48  
49  
50  
51  
52  
53  
54  
55  
56  
57  
58  
59  
60

1  
2  
3  
4  
5  
6  
7  
8  
9  
10  
11  
12  
13  
14  
15  
16  
17  
18  
19  
20  
21  
22  
23  
24  
25  
26  
27  
28  
29  
30  
31  
32  
33  
34  
35  
36  
37  
38  
39  
40  
41  
42  
43  
44  
45  
46  
47  
48  
49  
50  
51  
52  
53  
54  
55  
56  
57  
58  
59  
60

### Experience harm

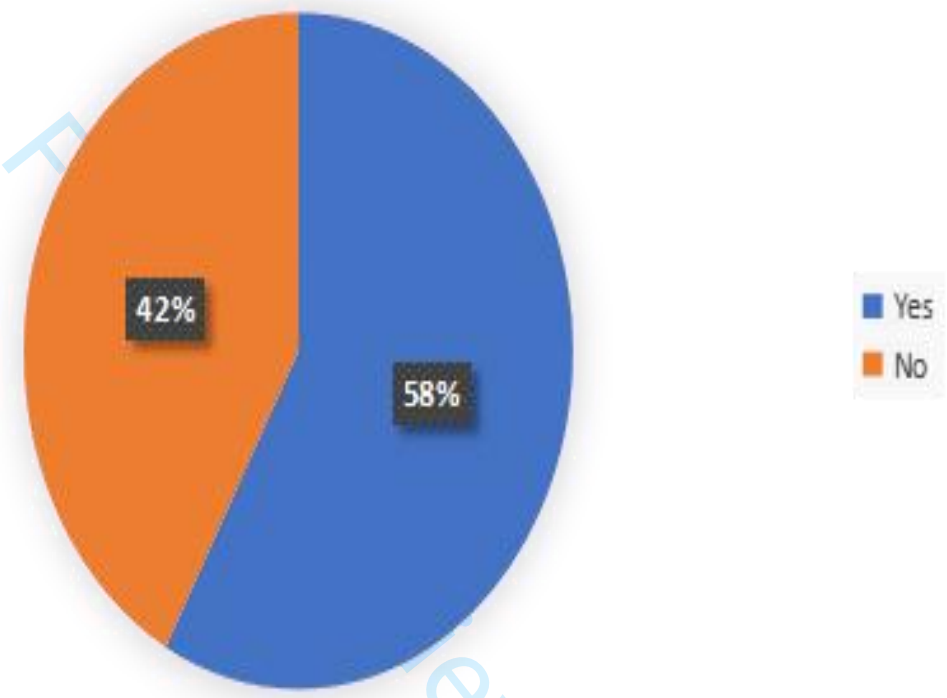

**Figure 1**

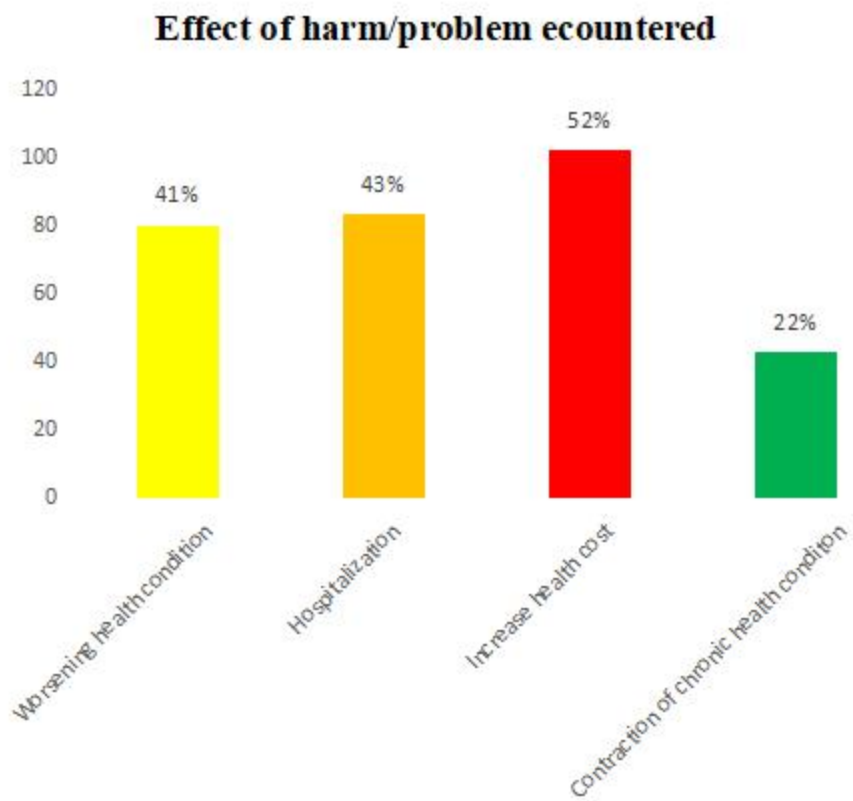

Figure 2



26  
27  
28  
29

**Figure 1: Effects of harm or problems encountered among respondents**  
**Source: Field Survey, September (2022).**

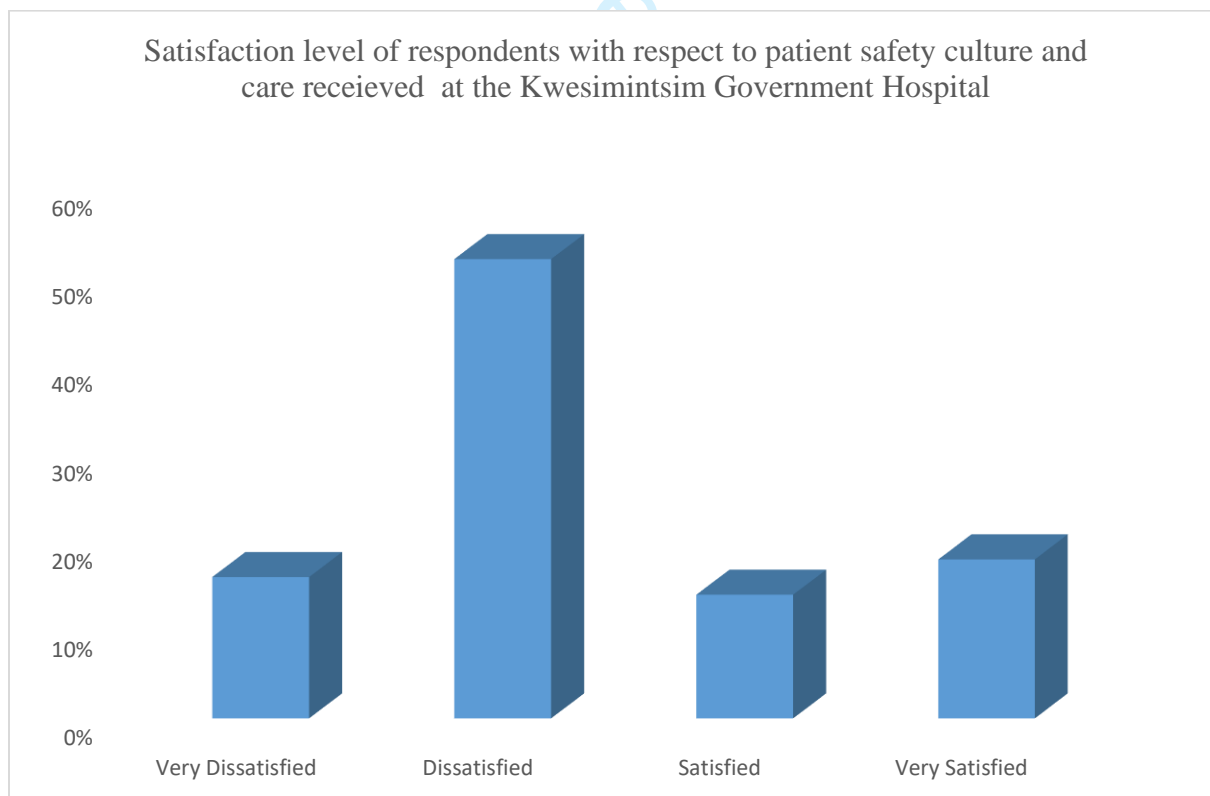

55  
56  
57  
58  
59  
60

**Figure 2: Level of satisfaction with patient safety protocols and care received among the respondents**  
**Source: Field Survey, September (2022).**

**STROBE Statement—checklist of items that should be included in reports of observational studies**

| Item                   | No        | Page Number | Line Number          |
|------------------------|-----------|-------------|----------------------|
| Title and abstract     | <b>1</b>  | 1-2         | 1-84                 |
| Introduction           |           |             |                      |
| Background/rationale   | <b>2</b>  | 3-5         | 85-135               |
| Objectives             | <b>3</b>  | 5           | 136-144              |
| <b>Methods</b>         |           |             |                      |
| Study design           | <b>4</b>  | 5-9         | 145-219              |
| Setting                | <b>5</b>  | 6           | 152-166              |
| Participants           | <b>6</b>  | 7 and 9-10  | 167-180 and 223-242  |
| Variables              | <b>7</b>  | 7-8         | 192-198              |
| Data sources           | <b>8</b>  | 7           | 185-187              |
| Bias                   | <b>9</b>  | 8           | 199-206              |
| Study size             | <b>10</b> | 7           | 175-181              |
| Quantitative variables | <b>11</b> | 8           | 196-197              |
| Statistical methods    | <b>12</b> | 8 and 13-15 | 203-2016 and 285-315 |

|                   |            |       |         |
|-------------------|------------|-------|---------|
| <b>Results</b>    |            |       |         |
| Participants      | <b>13</b>  | 9-10  | 234-242 |
| Descriptive data  | <b>14</b>  | 10-13 | 243-283 |
| Outcome data      | <b>15</b>  | 10-13 | 243-283 |
| Main results      | <b>N/A</b> |       |         |
| Other analyses    | <b>17</b>  | 13-16 | 285-321 |
| <b>Discussion</b> |            |       |         |
| Key results       | <b>18</b>  | 19    | 391-393 |
| Limitations       | <b>19</b>  | 19    | 398-406 |
| Interpretation    | <b>20</b>  | 17-19 | 327-383 |
| Generalisability  | <b>21</b>  | 19    | 393-397 |
| Funding           | <b>22</b>  | 20    | 412-413 |



# BMJ Open

## PATIENT SAFETY CULTURE AND SATISFACTION IN GHANA: A FACILITY-BASED CROSS-SECTIONAL STUDY

|                                 |                                                                                                                                                                                                                                                                                                                                                                                                                                                                                                                                                                                                                                                                                                                                                                                                                                                                                                                                                             |
|---------------------------------|-------------------------------------------------------------------------------------------------------------------------------------------------------------------------------------------------------------------------------------------------------------------------------------------------------------------------------------------------------------------------------------------------------------------------------------------------------------------------------------------------------------------------------------------------------------------------------------------------------------------------------------------------------------------------------------------------------------------------------------------------------------------------------------------------------------------------------------------------------------------------------------------------------------------------------------------------------------|
| Journal:                        | <i>BMJ Open</i>                                                                                                                                                                                                                                                                                                                                                                                                                                                                                                                                                                                                                                                                                                                                                                                                                                                                                                                                             |
| Manuscript ID                   | bmjopen-2023-073190.R2                                                                                                                                                                                                                                                                                                                                                                                                                                                                                                                                                                                                                                                                                                                                                                                                                                                                                                                                      |
| Article Type:                   | Original research                                                                                                                                                                                                                                                                                                                                                                                                                                                                                                                                                                                                                                                                                                                                                                                                                                                                                                                                           |
| Date Submitted by the Author:   | 23-Dec-2023                                                                                                                                                                                                                                                                                                                                                                                                                                                                                                                                                                                                                                                                                                                                                                                                                                                                                                                                                 |
| Complete List of Authors:       | Botchwey, Charles; University of Education Winneba, Health Administration and Education<br>Boateng, Agatha; University of Education Winneba, Health Administration and Education<br>Ahimah, Patricia; University of Education Winneba, Health Administration and Education<br>Acquah, Francis; University of Education Winneba, Health Administration and Education<br>Adoma, Prince; University of Education Winneba, Health Administration and Education<br>Kumah, Emmanuel; University of Education Winneba, Health Administration and Education<br>Boakye, Dorothy; University of Education Winneba, Health Administration and Education<br>Boahen, Ebenezer; University of Education Winneba, Health Administration and Education<br>Kruh, Vivian; University of Cape Coast College of Humanities and Legal Studies, Population and Health<br>Koomson, Joseph; University of Cape Coast College of Humanities and Legal Studies, Population and Health |
| <b>Primary Subject Heading</b>: | Health services research                                                                                                                                                                                                                                                                                                                                                                                                                                                                                                                                                                                                                                                                                                                                                                                                                                                                                                                                    |
| Secondary Subject Heading:      | Health services research, Health policy                                                                                                                                                                                                                                                                                                                                                                                                                                                                                                                                                                                                                                                                                                                                                                                                                                                                                                                     |
| Keywords:                       | Health policy < HEALTH SERVICES ADMINISTRATION & MANAGEMENT, Decision Making, Health Equity, Clinical governance < HEALTH SERVICES ADMINISTRATION & MANAGEMENT                                                                                                                                                                                                                                                                                                                                                                                                                                                                                                                                                                                                                                                                                                                                                                                              |
|                                 |                                                                                                                                                                                                                                                                                                                                                                                                                                                                                                                                                                                                                                                                                                                                                                                                                                                                                                                                                             |

SCHOLARONE™  
Manuscripts



I, the Submitting Author has the right to grant and does grant on behalf of all authors of the Work (as defined in the below author licence), an exclusive licence and/or a non-exclusive licence for contributions from authors who are: i) UK Crown employees; ii) where BMJ has agreed a CC-BY licence shall apply, and/or iii) in accordance with the terms applicable for US Federal Government officers or employees acting as part of their official duties; on a worldwide, perpetual, irrevocable, royalty-free basis to BMJ Publishing Group Ltd ("BMJ") its licensees and where the relevant Journal is co-owned by BMJ to the co-owners of the Journal, to publish the Work in this journal and any other BMJ products and to exploit all rights, as set out in our [licence](#).

The Submitting Author accepts and understands that any supply made under these terms is made by BMJ to the Submitting Author unless you are acting as an employee on behalf of your employer or a postgraduate student of an affiliated institution which is paying any applicable article publishing charge ("APC") for Open Access articles. Where the Submitting Author wishes to make the Work available on an Open Access basis (and intends to pay the relevant APC), the terms of reuse of such Open Access shall be governed by a Creative Commons licence – details of these licences and which [Creative Commons](#) licence will apply to this Work are set out in our licence referred to above.

Other than as permitted in any relevant BMJ Author's Self Archiving Policies, I confirm this Work has not been accepted for publication elsewhere, is not being considered for publication elsewhere and does not duplicate material already published. I confirm all authors consent to publication of this Work and authorise the granting of this licence.

PATIENT SAFETY CULTURE AND SATISFACTION IN GHANA: A FACILITY-BASED CROSS-SECTIONAL STUDY

CHARLES OWUSU-ADUOMI BOTCHWEY<sup>1</sup>; AGARTHA AFFUL BOATENG<sup>2</sup>; PATRICIA OFORI AHIMAH<sup>3</sup>; FRANCIS ACQUAH<sup>4</sup>; PRINCE OWUSU ADOMA<sup>5</sup>; EMMANUEL KUMAH<sup>6</sup>; DOROTHY SERWAA BOAKYE<sup>7</sup>; EBENEZER ADDAE BOAHEN<sup>8</sup>; VIVIAN KRUIH<sup>9</sup> AND JOSEPH BOB KOW KOOMSON<sup>10</sup>

**Lead and Corresponding author:**

**Charles Owusu-Aduomi Botchwey, University of Education, Winneba, Faculty of Science Education, Department of Health Administration and Education, Post Office Box 25, Winneba, Central Region, Ghana. Email address: [chaboat08@yahoo.com](mailto:chaboat08@yahoo.com) Telephone Number: +233598014015**

**Information about the co-authors:**

1. **Charles Owusu-Aduomi Botchwey**, University of Education, Winneba, Faculty of Science Education, Department of Health Administration and Education, Post Office Box 25, Winneba, Central Region, Ghana.
2. **Agartha Afful Boateng**, University of Education, Winneba, Faculty of Science Education, Department of Health Administration and Education, Post Office Box 25, Winneba, Central Region, Ghana.
3. **Patricia Ofori Ahimah**, University of Education, Winneba, Faculty of Science Education, Department of Health Administration and Education, Post Office Box 25, Winneba, Central Region, Ghana.
4. **Francis Acquah**, University of Education, Winneba, Faculty of Science Education, Department of Health Administration and Education, Post Office Box 25, Winneba, Central Region, Ghana.
5. **Price Owusu Adoma**, University of Education, Winneba, Faculty of Science Education, Department of Health Administration and Education, Post Office Box 25, Winneba, Central Region, Ghana.
6. **Emmanuel Kumah**, University of Education, Winneba, Faculty of Science Education, Department of Health Administration and Education, Post Office Box 25, Winneba, Central Region, Ghana.
7. **Dorothy Serwaa Boakye**, University of Education, Winneba, Faculty of Science Education, Department of Health Administration and Education, Post Office Box 25, Winneba, Central Region, Ghana.
8. **Ebenezer Addae Boahen**, University of Education, Winneba, Faculty of Science Education, Department of Health Administration and Education, Post Office Box 25, Winneba, Central Region, Ghana.
9. **Vivian Kruh**, University of Cape Coast, College of Humanities and Legal Studies, Faculty of Social Sciences, Department of Population and Health, Cape Coast, Ghana.
10. **Joseph Bob Kow Koomson**, University of Cape Coast, College of Humanities and Legal Studies, Faculty of Social Sciences, Department of Population and Health, Cape Coast, Ghana.

## Abstract

**Background:** Globally, one of the measures of high performing healthcare facilities is the compliance of patient safety culture, which encompasses the ability of health institutions to avoid or drastically reduce patient harm or risks. These risks or harm is linked with numerous adverse patient outcomes such as medication error, infections, unsafe surgery and diagnosis error.

**Objectives:** The general objective of this study was to investigate into the impact of patient safety culture practices experienced on patient satisfaction among patients who attend the Kwesimintsim Government Hospital in the Takoradi Municipality.

**Methods:** This study was a descriptive cross-sectional study and a consecutive sampling technique was used to select 336 respondents for the study. Data was collected using a structured questionnaire and processed using Statistical Package for Social Sciences, version 21. Both descriptive and inferential statistics were carried out and result present using figures and tables.

**Results:** The study found that the overall patient safety compliance level observed by the respondents was poor (29.2%). The prevalence of adverse events experienced among the respondents was high (58%). The leading adverse events mentioned were medication errors, followed by wrong prescriptions and infections. The consequences of these adverse events encountered by the respondents were mentioned as increased healthcare costs (52%), followed by hospitalisation (43%), worsening of health conditions (41%), and contraction of chronic health conditions (22%). Patient safety cultural practices such as teamwork ( $\beta = 0.17$ ,  $p = 0.03$ ), response to error ( $\beta = 0.16$ ,  $p = 0.005$ ), communication openness ( $\beta = 0.17$ ,  $p = 0.003$ ), and handoffs and information exchange ( $\beta = 0.17$ ,  $p = 0.002$ ) were found to positively influence patient satisfaction.

**Conclusion:** The poor general compliance of the patient safety culture in the facility is unfortunate, and this can affect healthcare outcomes significantly. The study therefore entreats facility managers and various stakeholders to see patient safety care as an imperative approach to delivering quality essential healthcare and to act accordingly to create an environment that supports it.

**Keywords:** Patient satisfaction, Government, Prevalence, Hospitalisation and Prescription.

## ‘Strengths and limitations of this study’

### Strengths of the Study

- The cross-sectional study helped to describe the characteristics of the population under investigation.
- Parametric assumptions were met to ensure reliable results.
- A representative sample size was used.

### Limitations of the Study

- The effect due to time was not captured due to the cross-sectional nature of the study design.
- The consecutive sampling technique could introduce biases in sampling.

## Background of the Study

Patient safety culture is an essential factor in determining the ability of hospitals to treat and reduce patient risks(1). Patient safety is regarded as an international health concern affecting patients in various health care settings globally. This is due to the complexity of health care systems and the increase in unsafe care delivered to patients in various health institutions(2, 3). The global healthcare landscape is said to be undergoing a transformative shift as health systems continue to operate within increasingly complex environments(4) driven by technology. Though fresh actions, emerging technologies and care models can have healing prospect, they can also trigger different dangers to safe care. Patient safety is a vital standard of health care and is now being acknowledged as a huge and rising global public health encounter. Worldwide determinations to decrease the affliction of patient harm have not accomplished considerable transformation over the previous one and half decades. As also highlighted by the World Health Organisation, unsafe care leading to adverse events is said to have the potential to be counted among the top 10 causes of death and disability worldwide(5) with associated annual cost amounting trillions(6). It thus, indicate that patient safety during care is crucial in improving health in a long term.

Patient safety culture is an integrated pattern of individual and organisational behaviour. This is based upon shared beliefs and values that continuously seek to minimise the patient harm, which may result from the process of care delivery(3). It is also referred to as the outcome of individual and organisation's values, attitudes, perceptions, competencies, and patterns of behaviour that determine the commitment to, and the style and proficiency of, an organisation's health and safety management(7). Patient safety and related practices or activities include but not limited to, patient and family engagement and communication; management support; response to error; adherence to ethical practices such as respect, privacy, and confidentiality; adherence to clinical protocols in the delivery of care such as proper hand washing practices; personnel training on quality improvement

1  
2  
3 and relations; and use of standard and certified medical devices, among others in healthcare  
4 organisations(1, 8, 9, 10).  
5  
6

7  
8 All these could be achieved through setting up clear policies, having skilled healthcare  
9 professionals, all-level leadership, up-to-date data, and patient-centered care in order to maintain  
10 healthcare safety sustainability(3). Several studies stress the importance of patient safety culture  
11 for patient safety processes and outcomes(11). More specifically, research has shown that a sound  
12 patient safety culture is associated with fewer adverse events(12) and more positive patient  
13 experiences(13).  
14  
15  
16  
17  
18  
19  
20  
21

22 A systematic review(11) found that a positive workplace culture was related to several desirable  
23 patient outcomes, such as fewer infections, reduced rates of mortalities and increased patient  
24 satisfaction. Studies have also shown that promoting patient safety culture among healthcare  
25 providers is a key to reducing adverse events and maintaining quality of care(14).  
26  
27  
28  
29  
30  
31

32 Adverse events also known as medical errors are one of the numerous factors that affect patient  
33 safety within health facilities. Adverse events are ‘unintended injuries or complications that are  
34 caused by health care management rather than by the patient’s underlying disease. These can lead  
35 to death, disability at the time of discharge and prolonged hospital stay(15). Adverse events or  
36 medical errors that significantly contribute to unsafe care and harm to patients which subsequently  
37 affect patient safety are medication errors, nosocomial infections, unsafe surgeries, wrong  
38 injections, procedures, and diagnostic errors(16). The prevalence of adverse events by medical  
39 professionals has been alarming.  
40  
41  
42  
43  
44  
45  
46  
47  
48  
49  
50

51 In Iran, a review study revealed that the prevalence of adverse events exists between 10% and  
52 80%.(17). Another study conducted on the prevalence of adverse events revealed that about 7 out  
53  
54  
55  
56  
57  
58  
59  
60

1  
2  
3 of 10 selected professional nurses declared engaging in adverse events resulting in harm to  
4 patients(18).

5  
6  
7  
8 Measures taken to improve upon patient safety have demonstrated different levels of  
9 effectiveness(19). Moreover, several prior studies conducted among medical staff have shown that  
10 higher levels of awareness of patient safety culture are associated with higher patient overall  
11 satisfaction and lower occurrence of adverse events(20, 21). In Ghana, the vital points  
12 acknowledged in the patient safety situational exploration were knowledge and learning in patient  
13 safety while patient safety surveillance was the frailest act identified. There were also flaws in  
14 areas such as national patient policy, healthcare related infections, surgical safety, patient safety  
15 partnerships and patient safety funding, respectively(22). It is against this background that the  
16 researchers seek to investigate into patient safety culture among patients and its impact on their  
17 overall satisfaction of care received at the Kwesimintim Government Hospital in the Takoradi  
18 Municipality of Ghana.

### 31 32 33 34 35 **Objectives**

36  
37  
38 The general objective of this study is to investigate the impact of patient safety culture experienced  
39 on patient satisfaction among patients who attend the Kwesimintim Government Hospital  
40 Takoradi. Specifically, this study sought to: (a) assess patient safety culture protocol compliance  
41 at Kwesimintim Government Hospital, Takoradi Municipality (b) measure the prevalence of  
42 adverse events of patient safety culture protocols compliance and their effects on patients safety  
43 among patients who attend Kwesimintim Government Hospital, Takoradi and (c) determine the  
44 impact of patient safety culture practises on patient satisfaction among patients who attend the  
45 Kwesimintim Government Hospital, Takoradi.

## Methods

This study deployed a facility-based cross-sectional study design using a quantitative approach to obtain the necessary data required for the accomplishment of the study. This design and approach to research focuses on carefully measuring a set of variables to answer theory-guided research questions or hypotheses(23). The study was conducted at Kwesimintsim Government Hospital because of its strategic location and the numerous communities it serves. The Kwesimintsim Government Hospital was selected due to its size, as well as the number of communities it serves.

The Kwesimintsim Government Hospital is the district hospital for the Effia-Kwesimintsim Municipal Assembly in Ghana. It is the referral point for an estimated population of 89,342 and the second major referral health facility in Takoradi. The hospital was established in the year 1977, was expected to cater for the healthcare needs of the communities in, and around the Kwesimintsim municipality but the facility is now serving the communities beyond its catchment area including Ahanta West, Mpohor, Wassa East and the Tarkwa Nsuaem Districts. The hospital supervises other health institutions (both private and public) within the Kwesimintsim sub-metro. The sub-districts are West Tanokrom, Lagos town, Sawmill, Kwesimintsim town, Kwesimintsim Zongo, Anaji and Apramdo.

A 5-member management team made up of the Medical Superintendent, Health Service Administrator, the Head of Nursing, the Head of Pharmacy and the Head of Finance guides the operations of the hospital. There are also a number of operational committees, which help in the management of the hospital. They include the Disciplinary Committee, the Audit Committee, the Welfare Committee, the Entity Tender Committee, and Data Validation Committee among others(24).



1  
2  
3 The target population for this study encompassed all individuals seeking healthcare services at the  
4 Kwesimintsim Government Hospital in Ghana. Therefore, the estimated number of 89,342 patients  
5 served by the facility was considered as the size of the target population. The assumptions of using  
6 Yamane's(25) sampling formula to compute the sampling size was based on a 95% confidence  
7 interval, and 5% margin of error. To achieve a statistical power of 0.9 and at an alpha level of 0.05,  
8 the study computed the sampling size as follows:  $n = \frac{N}{1 + N(e^2)}$ ,  
9  
10  
11  
12  
13  
14

15 Where  $n$  is the sample size,  $N$  is the study population size for the proposed period of data collection  
16 and  $e$  is the level of precision. The study population ( $N$ ) for this study is presumed to be 89,342.  
17  
18 The level of precision ( $e$ ) is 0.05 (95% confidence interval).  
19  
20  
21

$$22 \quad n = \frac{89,342}{1 + 89,342(0.05^2)},$$

$$23 \quad n = \frac{89,342}{1 + 89,342(0.0025)},$$

$$24 \quad n = \frac{89,342}{1 + 223.355},$$

$$25 \quad n = \frac{89,342}{224.355},$$

$$26 \quad n = 398.23$$

27  
28  
29 Therefore, 398 was the estimated sample size for the study.  
30  
31  
32  
33  
34  
35  
36  
37  
38  
39  
40

41 Consecutive sampling method whereby every eligible and available participant was recruited until  
42 the desired sample size was reached based on the inclusion criteria applied in this study. This  
43 method was appropriate for the study because of the ill-health conditions of patients, which often  
44 made some of them not fit or ready for data collection. The study recruited patients who visited  
45 the hospital during the data collection period. To ensure ethical compliance, prior to their  
46 participation, all patients involved in the study provided informed consent by signing the consent  
47 form. Additionally, the hospital granted its approval for the study. The study excluded inpatients  
48  
49  
50  
51  
52  
53  
54  
55  
56  
57  
58  
59  
60

1  
2  
3 admitted to the hospital due to their perceived inability due to ill-health (i.e., inability to perhaps  
4 not provide accurate responses).  
5  
6

7  
8  
9 Structured (closed and open-ended) questionnaire was used to collect data from the sampled  
10 respondents. The questionnaire was self-administered and a high level of discretion was kept to  
11 protect the identities and views of the respondents. The questionnaire was made up of four parts.  
12  
13 The first part interrogated the respondents on their demographic data. The second part interrogated  
14 the respondents on the compliance of patient safety culture protocols witnessed in the facility. The  
15 third part interrogated the respondents on adverse events they have experienced in the health  
16 facility and their consequences on them. The final part of the questionnaire interrogated the  
17 respondents on their satisfaction regarding patient safety culture practices witnessed and care  
18 received at the health facility. Patient satisfaction and safety cultural practices were the main  
19 dependent and independent variables of the study respectively. The study considered seven  
20 independent safety culture and related practices and these include: frequency of event reported;  
21 teamwork; response to error; communication openness; management support; handoffs;  
22 information exchange and staffing.  
23  
24  
25  
26  
27  
28  
29  
30  
31  
32  
33  
34  
35  
36  
37  
38  
39

40 In order to ensure the validity of the content of the questionnaires, they were given to two experts  
41 who understood the topic under investigation to comment and add their input. The patient safety  
42 practices were adapted from(26).The study used single-item measures for the variables used in the  
43 inferential statistics because of brevity and the need to assess several constructs(27); hence, there  
44 was no need to carry out construct validity analyses such as confirmatory factor analysis and  
45 others. Nevertheless, various tests needed to confirm parametric assumptions such as normality,  
46 homogeneity of variance, and multicollinearity, among others, to ensure reliable estimation were  
47 carried out and met before the main inferential analysis of interest was carried out.  
48  
49  
50  
51  
52  
53  
54  
55  
56  
57  
58  
59  
60

1  
2  
3 Data obtained from the study were entered into a Microsoft Excel spreadsheet and imported into  
4  
5 SPSS computational tool (version 22) to generate the study findings. Both descriptive and  
6  
7 inferential statistics were carried out and result visualized using tables and figures. The study was  
8  
9 conducted between 2nd September, 2022 and 30th June, 2023 and achieved a response rate of  
10  
11  
12 84%.  
13  
14

### 15 16 **Patient and public involvement**

17  
18  
19 Patients and the public's involvement was encountered during the gap identification stage, the  
20  
21 questionnaire design stage, and the data collection stage. The areas to be explored and wording of  
22  
23 items were discussed with randomly selected patients prior to the data collection, and their output  
24  
25 was considered during the final design of the questionnaire. The facility engagement resulted in  
26  
27 the approval of the study and the nomination of staff to assist in the data collection process. The  
28  
29 authors also intend to disseminate the published results of the study to the public through a seminar  
30  
31 at the hospital and various community communication channels.  
32

### 33 **Data sharing statement**

34 Authors want to state that the data for this study would be made available upon a written request.  
35

### 36 **Ethical clearance reference number**

37  
38 The study sought ethical approval from its study sitting and its reference number is:  
39  
40 GHS/WR/EKMA/KH/ATT/2022  
41

## 42 **Presentation of Results**

### 43 44 **Demographic Characteristics of the Respondents**

45  
46 In all, three hundred and thirty-six (336) respondents responded to the study. More than half of the  
47  
48 respondents (n=212, 63%) were females and males constituted 37% of the respondents (n=124).  
49  
50 More than half of the respondents were aged 31-40 years (n=181, 54%), followed by respondents  
51  
52 aged 21-30 years (n=121, 36%), followed by respondents aged 41 years and over (n=24, 7%) and  
53  
54 less than a quarter (n=10, 3%) were aged 16-20 years. An overwhelming majority of the  
55  
56  
57  
58  
59  
60

respondents were Christians (n=319, 95%) and the remaining few were Muslims (n=17, 5%). Majority of the respondents were single in terms of marital status (n=212) denoting 63% of the respondents, a little over one-fourth were married (n=94, 28%) and almost one out of every 10 respondents was a divorcee (n=30, 9%). With respect to the educational qualification of the 336 respondents, almost half of them were basic school and Senior High School graduates (n=155, 46%), followed by respondents with no formal education (n=19, 6%) and very minute portion of the respondents (n=7, 2%) were University graduates. With regards to the employment category of the respondents, almost half of them were self-employed (n=165, 49%), followed by more than one-third who were unemployed (n=128, 38%), followed by students who were 27 in number (8%), followed by respondents who were private-sector employees (n=13, 4%) and only 1 of the respondents (1%) was a government-employee. **Table 1** summarises the demographic characteristics of the respondents.

**Table 1: Demographic characteristics of the respondents.**

| Characteristics         | Frequency | Percentage (%) |
|-------------------------|-----------|----------------|
| Gender                  |           |                |
| Females                 | 124       | 36.90          |
| Males                   | 212       | 63.10          |
| Age                     |           |                |
| 16-20                   | 10        | 2.98           |
| 21-30                   | 121       | 36.01          |
| 31-40                   | 181       | 53.87          |
| 41 and over             | 24        | 7.14           |
| Marital                 |           |                |
| Single                  | 212       | 63.10          |
| Married                 | 94        | 27.98          |
| Divorced                | 30        | 8.93           |
| Religion                |           |                |
| Christians              | 319       | 94.94          |
| Muslims                 | 17        | 5.06           |
| Employment category     |           |                |
| Unemployed              | 128       | 38.10          |
| Government employee     | 3         | 0.89           |
| Private-sector employee | 13        | 3.87           |
| Self-employed           | 165       | 49.11          |

|                           |     |       |
|---------------------------|-----|-------|
| Student                   | 27  | 8.04  |
| Educational qualification |     |       |
| No formal education       | 19  | 5.65  |
| Basic education           | 155 | 46.13 |
| Secondary education       | 155 | 46.13 |
| Bachelor's degree         | 7   | 2.08  |

### Patient safety culture protocols compliance

The first objective of the study was to assess patient safety culture protocols compliance by health workers and management of the Kwesimintsim Government Hospital in the Takoradi Municipality from the perspectives of patients. The study presented 13 patient safety protocols statements for which the respondents (patients) were asked to state if each of the protocols were observed by staff and management of the health facility. The overall score for compliance was computed through evaluating the mean score of the protocols investigated. The overall safety protocol compliance level was found to be very abysmal (29.2%) in this study. **Table 2** presents these findings.

**Table 2: Patient safety culture protocols compliance.**

| Safety Protocols                                                               | Frequency of yes responses (N = 336) | Percentage (%) |
|--------------------------------------------------------------------------------|--------------------------------------|----------------|
| When one unit gets busy, other health workers help.                            | 306                                  | 91.1           |
| Staff actively do things to improve patient safety.                            | 115                                  | 34.2           |
| Hospital units work well together to provide the best care for patients.       | 245                                  | 72.9           |
| Hospital management provides a work climate that promotes patient safety.      | 175                                  | 52.1           |
| The actions of hospital management show that patient safety is a top priority. | 160                                  | 47.6           |
| Important patient care information is often not lost among staff.              | 199                                  | 59.2           |
| Problems do not often occur in the exchange of information across the units.   | 44                                   | 13.1           |
| Patient safety is never sacrificed to get work done.                           | 30                                   | 8.9            |

|                                                                                      |   |             |
|--------------------------------------------------------------------------------------|---|-------------|
| The procedures and systems at the facility are good at preventing errors.            | 0 | 0           |
| Staff freely speak up if they see something that may negatively affect patient care. | 0 | 0           |
| Staff feel free to question the decisions of those with more authority.              | 0 | 0           |
| Staff are not afraid to ask questions when something does not seem right.            | 0 | 0           |
| Staff report any error they make to promote patient safety.                          | 3 | 0.9         |
| <b>Overall average compliance rate (%)</b>                                           |   | <b>29.2</b> |

N= total number of respondents

### **Prevalence of adverse events of patient safety culture protocols compliance and their effects on patient's safety**

To assess the adverse events of patient safety culture protocols compliance, respondent were asked to indicate whether they have encountered harm or problem as a result of care received at the facility for the past three years. As in **Fig 1**, 195 representing 58% of the respondents indicated that they have incurred harm before as a result of care received at the facility for the past three years. See Figure 1 in appendix.

The study further asked those who indicated that they have experience harm before as a result of care received to identify or associate the possible harm received or problem encountered across a list of problems or harm. Medical error followed by wrong prescription and infections were found to be the most problems or harm encountered as a result of none adherence to patient safety culture protocol compliance as detailed in **Table 3**.

**Table 3: Harms or Problems encountered as a result of none adherence to patient safety culture protocol compliance.**

| <b>Problems/Harms encountered</b> | <b>Frequency (N=195)</b> | <b>Percentage (%)</b> |
|-----------------------------------|--------------------------|-----------------------|
| Medication error                  | 105                      | 53.8                  |
| Infections                        | 96                       | 49.2                  |
| Unsafe surgery                    | 21                       | 10.8                  |
| Diagnosis error                   | 86                       | 46.1                  |

|                           |     |      |
|---------------------------|-----|------|
| Wrong injection           | 45  | 23.1 |
| Wrong treatment procedure | 91  | 46.7 |
| Wrong prescription        | 101 | 51.8 |

N = number of people who indicated they have experience problem or harm in the cause of receiving care.

Respondent were again asked to indicate the effect such problems or harm encountered at the facility yields to. Increasing of health expenditure (n = 102) followed by hospitalization (n = 83) and worsening of health condition (n = 80) were the popular effect mentioned as shown in **Fig 2**.

See Figure 2 in appendix.

### Inferential Statistics

The final objective of this study was to determine the impact of patient safety culture practices on patient satisfaction. The study established this through regression analysis. Before undertaking such analysis certain assumptions were very crucial to be met in order to product accurate and robust results. The first assumption to be explored was multicollinearity. **Table 4** shows the correlation matrix between the dependent (patient satisfaction) and safety culture practices (i.e., variables 2 to 8), the independent variables. The result of the correlations was examined using the Holm correction to adjust for multiple comparisons based on an alpha value of .05. It could be observed that there is no multicollinearity present. This is because there is no correlation between any of the variables exceeding 0.5.

**Table 4: Correlation between the independent and dependent variables**

| Variable                       | 1    | 2     | 3    | 4     | 5     | 6     | 7     | 8     |
|--------------------------------|------|-------|------|-------|-------|-------|-------|-------|
| 1. Satisfaction                | 1    | 0.02  | .17* | 0.11  | .19*  | 0.03  | 0.13  | .17*  |
| 2. Frequency of event reported | 0.02 | 1     | 0.06 | -0.05 | -0.12 | 0.1   | 0.1   | -.23* |
| 3. Teamwork                    | .17* | 0.06  | 1    | .19*  | .17*  | -0.16 | -0.09 | 0.11  |
| 4. Response to error           | 0.11 | -0.05 | .19* | 1     | -0.12 | -0.12 | -.28* | -0.05 |
| 5. Communication openness      | .19* | -0.12 | .17* | -0.12 | 1     | 0.02  | -0.03 | .24*  |

|                                      |      |       |       |       |       |      |      |      |
|--------------------------------------|------|-------|-------|-------|-------|------|------|------|
| 6. Management support                | 0.03 | 0.1   | -0.16 | -0.12 | 0.02  | 1    | .23* | 0    |
| 7. Handoffs and information exchange | 0.13 | 0.1   | -0.09 | -.28* | -0.03 | .23* | 1    | 0.11 |
| 8. Staffing                          | .17* | -.23* | 0.11  | -0.05 | .24*  | 0    | 0.11 | 1    |

Note. \* *p* value is significant.

The normality assumption was explored with the Q-Q plot, and the result did not deviate much from normality; besides, the sample size was even greater enough to evoke the central limit theorem. Studentized residuals plot for outlier detection was explored and there was no presence of outlier. The assumption of homoscedasticity was tested using the Breusch-Pagan the result turns to be insignificant indicating homoscedasticity. We attached all these assumption analysis as an appendix. Following the satisfactory fulfillment of these crucial parametric assumptions, we conducted the regression analysis. As indicated in Table 5, the regression model exhibited statistical significance, as evidenced by the F-statistic and R-square values ( $F(7,325) = 5.71, p < .001, R^2 = .11$ ).

**Table 5: Model Fit Measures**

|       |                | Overall Model Test |     |     |       |
|-------|----------------|--------------------|-----|-----|-------|
| R     | R <sup>2</sup> | F                  | df1 | df2 | p     |
| 0.331 | 0.11           | 5.71               | 7   | 325 | <.001 |

From the regression output (see Table 6), it is established again that there is no presence of multicollinearity looking at the variance inflation factor (VIF) across all the independent variable indicating some level of confidence in the regression output. From the regression output, it is observed that teamwork ( $\beta = 0.17, p = 0.03$ ), response to error ( $\beta = 0.16, p = 0.005$ ), communication openness ( $\beta = 0.17, p = 0.003$ ) and Handoffs and information exchange ( $\beta = 0.17, p = 0.002$ ) all significantly predict patient satisfaction. Management support, frequency of event reported and staffing did not however significant predict patient satisfaction at the selected significant level of 0.05.



**Table 6: Results for Linear Regression with Frequency event reported, Teamwork, Response to error, Communication openness, Management support, Handoffs and information exchange, and Staffing predicting patient Satisfaction**

| Variable                          | B     | SE   | 95.00% CI      | $\beta$ | t    | p     | VIF  |
|-----------------------------------|-------|------|----------------|---------|------|-------|------|
| (Intercept)                       | 0.46  | 0.36 | [-0.25, 1.18]  | 0       | 1.27 | 0.206 |      |
| Frequency of event reported       | 0.006 | 0.04 | [-0.07, 0.08]  | 0.008   | 0.15 | 0.88  | 1.1  |
| Teamwork                          | 0.04  | 0.02 | [0.004, 0.07]  | 0.12    | 2.16 | 0.031 | 1.13 |
| Response to error                 | 0.11  | 0.04 | [0.03, 0.18]   | 0.16    | 2.85 | 0.005 | 1.15 |
| Communication openness            | 0.17  | 0.06 | [0.06, 0.28]   | 0.17    | 3    | 0.003 | 1.12 |
| Management support                | 0.02  | 0.04 | [-0.07, 0.10]  | 0.02    | 0.4  | 0.686 | 1.09 |
| Handoffs and information exchange | 0.13  | 0.04 | [0.05, 0.21]   | 0.17    | 3.07 | 0.002 | 1.17 |
| Staffing                          | 0.08  | 0.04 | [-0.005, 0.16] | 0.1     | 1.85 | 0.065 | 1.15 |

## Discussion

This study sought to assess patient safety culture compliance, determine the prevalence of adverse events related to patient safety culture protocols and their effects, and evaluate the impact of patient safety culture practices on patient satisfaction.

Patient safety culture compliance has become the sine qua non approach to delivering healthcare that does not only minimise medical errors but also captures the responsiveness of a healthcare system entrenched in meeting patient's frivolous expectations. The World Health Organisation recognised patient safety-centred care as the pivotal foundation for delivering quality essential health services(3). It is unfortunate that the study's findings on safety culture compliance overall estimation was not that appreciable (29.2% adherence rate) and therefore seems to support the existing evidence(5, 17, 18). On the other hand, it is not surprising to observe this outcome given the study setting. Reports from the Media in Ghana have consistently highlighted how patients are taken for granted especially in government healthcare facilities. This ill safety culture compliance could be attributed to several factors. Medical negligence on the part of the healthcare profession as documented in the country(28), poor facility management and supervision(3), infrastructure and technological limitation among others. Infrastructure and appropriate technology to meet the needs of the population who are constantly seeking care is a deficit or limitation for almost every Ghanaian government healthcare facility. Even so, poor management and supervision may be the most plausible factor for the ill patient safety culture compliance among professionals since it is common to observe government institutions, including healthcare facilities, being operational but lacking effective management. Public workers often prioritise their monthly remuneration over the quality and quantity of their output, in contrast to their counterparts in the private sector. Facility managers and leaders could do better in ensuring proper supervision.

The reported ill patient safety culture compliance among professionals in the study collides with the resulting significant number of people (58% of the respondents) who claim to have experienced harm or problems due to receiving care at the facility. This finding outcome was also in consistence with the finding of some existing studies where prevalence of adverse events was estimated from 10% to 80%(17, 18). Medical errors, wrong prescription, infections and hospitalisation mentioned

1  
2  
3 in literature as being part of the problem or harm often encountered when receiving care(16) is  
4 also highlighted in the study. Hygienic practices in most Ghanaian healthcare facilities are not up  
5 to standard even at the top resourced tertiary facilities and so the infection rate reported in the  
6 study may not be over-estimated. With several trained professional teachers in the country (Ghana)  
7 who cannot spell correctly basic daily words and write clearly(29), it is not unlikely that their  
8 counterpart (trained nurses) who administer medication and some instances prescribe medications  
9 (even though not certified for prescribing drugs) together with trained medical doctors offer or lure  
10 patients into getting wrong medications as observed in the study.  
11  
12  
13  
14  
15  
16  
17

18 Such anomaly (patient harm) in healthcare delivery most often elongate time and resource spent  
19 in seeking care, and so increasing of healthcare cost as the leading effect of this anomaly captured  
20 by the study was not unexpected. It is estimated that the aggregate costs of patient harm amount  
21 to trillions of dollars each year(6). With a significant number of people in Ghana living below the  
22 poverty line(30), this could jeopardise people's willingness to seek appropriate healthcare.  
23 Hospitalisation and worsening of healthcare conditions as a result of adverse events in patient  
24 safety culture protocols and compliance rates in the study are also concerning. If the attempt to  
25 seek healthcare is perceived to be accompanied with a new and deteriorating health condition, then  
26 a rational being would desist from making such attempts. The consequent effect may include  
27 routine self-medication and a delay in seeking appropriate healthcare services.  
28  
29  
30  
31  
32  
33  
34  
35

36 The study's last objective was to evaluate the impact of patient safety culture practices on patient  
37 satisfaction in the Ghanaian context since the two have been found to be associated with each  
38 other(11, 14). The study found four key patient safety practices that predicts patient satisfaction  
39 including teamwork, responsiveness to error, communication openness and handoffs and  
40 information exchange. If patient sees professional working as a team by supporting each other in  
41 addressing their healthcare needs, then they are likely to feel welcome to the facility and appreciate  
42 the healthcare professionals' efforts either than each professional appearing to be working on a  
43 function and tossing patients around without effective coordination. Moreover, if professionals are  
44 found admitting their limitations as human when they encounter them, a certain level of trust would  
45 be built and hence improve patient-professional relationship and the same argument holds for  
46 effective exchange of information and openness to communication. All of these would go a long  
47 way of reducing adverse events and ensuring some level of quality of care(14). These practices do  
48  
49  
50  
51  
52  
53  
54  
55  
56  
57  
58  
59  
60

1  
2  
3 not require hard or external resources, hence constant training of healthcare professional on these  
4 patient safety culture practices with effective management and supervision thereafter could play a  
5 major in creating a healthcare atmosphere that thrives on patient safety culture.  
6  
7

8  
9 The findings of this study identify a possible gap in patient safety care in the Ghanaian public  
10 healthcare system and recognise managers and leaders of the various healthcare facilities as  
11 catalysts to stimulate an atmosphere that supports patient safety-centred care given the forever  
12 anticipated limited available healthcare resources.  
13  
14  
15

## 16 17 **Conclusion**

18  
19 One of the hallmarks of modern healthcare institutions is the compliance of patient safety-centered  
20 care. This approach to healthcare delivery exposes patients to less risks and harm at the health  
21 facilities. The study however identified poor patient safety care and associated harms and effect.  
22  
23 The study also identified teamwork, effective communication and free exchange of information as  
24 having a positive impact on patient satisfaction. The study therefore entreats facility managers and  
25 various stakeholders to see patient safety care as an imperative approach to delivering quality  
26 essential healthcare services and monitor and implement novel interventions to promote and  
27 sustain patient safety protocol compliance in their respective settings.  
28  
29  
30  
31  
32  
33  
34  
35  
36  
37

## 38 **Study Limitations**

39  
40  
41 Just as in any empirical study, this particular inquiry is likewise susceptible to various  
42 methodological constraints, albeit concerted efforts were exerted to mitigate a subset of these  
43 limitations. The study used a cross-sectional survey, implying that changes due to time were not  
44 captured. The consecutive sampling technique deployed in the study also implies that several  
45 benefits of probabilistic sampling may not be attained. Finally, even though the sample size was  
46 adequate given the sampling technique and context of the study, including other facilities in the  
47 region with a larger sample size would have enriched the findings and allowed for comparative  
48 analysis. Given the aforementioned limitations, the study contends that it is pivotal and incumbent  
49 to undertake additional research endeavours as a means of procuring an enriched and holistic  
50  
51  
52  
53  
54  
55  
56  
57  
58  
59  
60

1  
2  
3 understanding of patient safety care. This includes the examination of supplementary secondary  
4 facilities pertaining to the topic at hand, thereby engendering a more all-encompassing  
5 apprehension of the topic's intricate dynamics nationwide. By encompassing other pertinent  
6 facilities within forthcoming investigations, a more expansive purview can be attained, resulting  
7 in heightened discernment and profound elucidation regarding patient safety care in Ghana.  
8  
9  
10  
11

## 12 **Contributorship**

13 **Design of study:** Charles Owusu-Aduomi Botchwey and Patricia Ofori Ahimah; **Date collection:**

14 Patricia Ofori Ahimah : **Analysis and or interpretation of data:** Charles Owusu-Aduomi

15 Botchwey, Agatha Afful Boateng, Patricia Ofori Ahimah, Francis Acquah, Prince Owusu Adoma,

16 Emmanuel Kumah, Dorothy Serwaa Boakye, Ebenezer Addae Boahen, Vivian Kruh, and Joseph

17 Bob Kow Koomson: **Drafting the manuscript:** Charles Owusu-Aduomi Botchwey, Agatha

18 Afful Boateng, Patricia Ofori Ahimah, Francis Acquah, Prince Owusu Adoma, Emmanuel Kumah,

19 Dorothy Serwaa Boakye, Ebenezer Addae Boahen, Vivian Kruh, and Joseph Bob Kow Koomson:

20 **Revising and proofreading of the manuscript:** Charles Owusu-Aduomi Botchwey, Agatha

21 Afful Boateng, Patricia Ofori Ahimah, Francis Acquah, Prince Owusu Adoma, Emmanuel Kumah,

22 Dorothy Serwaa Boakye, Ebenezer Addae Boahen; Vivian Kruh, and Joseph Bob Kow Koomson.

## 23 **Competing interest**

24 Authors declare no competing interest regarding this study.

## 25 **Ethics Approval Statement**

26 Authors declare that an approval was obtained from the Kwesimintsim Government Hospital  
27 before data collection commenced.

## 28 **Data sharing statement**

1  
2  
3 Authors declare that the data for this study will be made available upon a written request to the  
4 lead and corresponding author.  
5

## 6 **Funding**

7  
8 Authors declare that no funding was received  
9

## 10 **References**

- 11  
12 1. Kakemam E, Albelbeisi AH, Davoodabadi S, Ghafari M, Dehghandar Z, Raeissi P. Patient  
13 safety culture in Iranian teaching hospitals: baseline assessment, opportunities for improvement  
14 and benchmarking. *BMC Health Services Research*. 2022 Mar 26;22(1):403. Available at:  
15 <https://doi.org/10.1186/s12913-022-07774-0>  
16  
17  
18 2. Hamdan M, Saleem AA. Changes in patient safety culture in Palestinian public hospitals: impact  
19 of quality and patient safety initiatives and programs. *Journal of patient safety*. 2018 Sep  
20 1;14(3):e67-73. Available at:  
21 [https://journals.lww.com/journalpatientsafety/Abstract/2018/09000/Changes\\_in\\_Patient\\_Safety](https://journals.lww.com/journalpatientsafety/Abstract/2018/09000/Changes_in_Patient_Safety_Culture_in_Palestinian.21.aspx)  
22 [Culture\\_in\\_Palestinian.21.aspx](https://journals.lww.com/journalpatientsafety/Abstract/2018/09000/Changes_in_Patient_Safety_Culture_in_Palestinian.21.aspx)  
23  
24  
25 3. World Health Organisation. Patient Safety, Key facts. 2019 September. [cited 2022 June 19].  
26 Available from: <https://www.who.int/news-room/fact-sheets/detail/patient-safety>  
27  
28  
29 4. Chatzi AV, Malliarou M. The need for a nursing specific patient safety definition, a viewpoint  
30 paper. *International Journal of Health Governance*. 2023 May 23;28(2):108-16. Available at:  
31 <https://www.emerald.com/insight/content/doi/10.1108/IJHG-12-2022-0110>  
32  
33  
34 5. Jha A. Patient safety—a grand challenge for healthcare professionals and policymakers alike. In  
35 Round table at the Grand Challenges Meeting of the Bill & Melinda Gates Foundation 2018 Oct.  
36  
37 6. Slawomirski L, Auraen A, Klazinga NS. The economics of patient safety: strengthening a  
38 value-based approach to reducing patient harm at national level. 2017 Mar. Available  
39 <https://www.oecd.org/els/health-systems/The-economics-of-patient-safety-March-2017.pdf>  
40  
41 7. El-Sherbiny NA, Ibrahim EH, Abdel-Wahed WY. Assessment of patient safety culture among  
42 paramedical personnel at general and district hospitals, Fayoum Governorate, Egypt. *Journal of*  
43 *the Egyptian Public Health Association*. 2020 Dec;95:1-8. Available at:  
44 <https://doi.org/10.1186/s42506-019-0031-8>  
45  
46 8. Owusu-Aduomi Botchwey C, Boateng AA, Brown R, Acquah F, Saah FI, Kruh V, Ekanem AO,  
47 Boatemaa-Yeboah Y. Guardians of Health: Exploring Hand Hygiene Practices, Knowledge and  
48 Hurdles among Public Health Nurses in Effutu Municipality. *Hospital Practices and Research*.  
49 2023 Mar 15;8(1):224-32.  
50  
51  
52  
53 9. Kadivar M, Manookian A, Asghari F, Niknafs N, Okazi A, Zarvani A. Ethical and legal  
54 aspects of patient's safety: a clinical case report. *Journal of medical ethics and history of*  
55 *medicine*. 2017;10.  
56  
57  
58  
59

- 1  
2  
3 10. Altayyar SS. Medical devices and patient safety. *J Anal Pharm Res.* 2016;2(5):00034.  
4  
5  
6  
7 11. Braithwaite J, Herkes J, Ludlow K, Testa L, Lamprell G. Association between organisational  
8 and workplace cultures, and patient outcomes: systematic review. *BMJ open.* 2017 Nov  
9 1;7(11):e017708. Available at : <https://doi.org/10.1136/bmjopen-2017-017708>.  
10  
11  
12 12. Najjar S, Nafouri N, Vanhaecht K, Euwema M. The relationship between patient safety culture  
13 and adverse events: a study in Palestinian hospitals. *Safety in Health.* 2015 Dec;1:1-9. Available  
14 at: <https://doi.org/10.1186/s40886-015-0008-z>.  
15  
16 13. Abrahamson K, Hass Z, Morgan K, Fulton B, Ramanujam R. The relationship between nurse-  
17 reported safety culture and the patient experience. *The Journal of nursing administration.* 2016  
18 Dec 1;46(12):662-8. Available at: <https://www.jstor.org/stable/26813775>  
19  
20  
21 14. Sorra J, Gray L, Streagle S, et al. AHRQ Hospital Survey on Patient Safety Culture: User's  
22 Guide. (Prepared by Westat, under Contract No. HHS A290201300003C).  
23 AHRQ Publication No. 18-0036-EF (Replaces 04-0041, 15(16)-0049-EF). Rockville, MD:  
24 Agency for Healthcare Research and Quality. July 2018. Available at:  
25 <https://www.ahrq.gov/sops/quality-patient-safety/patientsafetyculture/hospital/index.html>  
26  
27  
28 15. Pertierra LR, Hughes KA, Vega GC, Olalla-Tárraga MÁ. High resolution spatial mapping of  
29 human footprint across Antarctica and its implications for the strategic conservation of avifauna.  
30 *PLOS one.* 2017 Jan 13;12(1):e0168280. Available at:  
31 <https://journals.plos.org/plosone/article?id=10.1371/journal.pone.0168280>  
32  
33  
34 16. Ghasemi M, Khoshakhlagh AH, Mahmudi S, Fesharaki MG. Identification and assessment of  
35 medical errors in the triage area of an educational hospital using the SHERPA technique in Iran.  
36 *International Journal of Occupational Safety and Ergonomics.* 2015 Jul 3;21(3):382-90. Available  
37 at: <https://doi.org/10.1080/10803548.2015.1073431>  
38  
39 17. Vaziri S, Fakouri F, Mirzaei M, Afsharian M, Azizi M, Arab-Zozani M. Prevalence of medical  
40 errors in Iran: a systematic review and meta-analysis. *BMC health services research.* 2019  
41 Dec;19(1):1-1. Available at :  
42 <https://bmchealthservres.biomedcentral.com/articles/10.1186/s12913-019-4464-8>  
43  
44  
45 18. Kakemam E, Albelbeisi AH, Davoodabadi S, Azarmi M, Zolghadr F, Mamene M. The impact  
46 of nurses' perceptions of systems thinking on occurrence and reporting of adverse events: A  
47 cross-sectional study. *Journal of nursing management.* 2022 Mar;30(2):482-90. Available at:  
48 <https://onlinelibrary.wiley.com/doi/full/10.1111/jonm.13524>  
49  
50  
51 19. Donaldson L, Ricciardi W, Sheridan S, Tartaglia R. Textbook of patient safety and clinical  
52 risk management. 2021. Available at :  
53 <https://europepmc.org/books/n/spr9783030594039/?extid=36315766&src=med>  
54  
55  
56  
57  
58  
59

- 1  
2  
3 20. Wang CH, Yen CD. Leadership and turnover intentions of Taiwan TV reporters: The  
4 moderating role of safety climate. *Asian Journal of Communication*. 2015 May 4;25(3):255-  
5 70. Available at: <https://www.tandfonline.com/doi/abs/10.1080/01292986.2014.960877>  
6  
7  
8 21. Yesilyaprak T, Demir Korkmaz F. The relationship between surgical intensive care unit nurses'  
9 patient safety culture and adverse events. *Nursing in Critical Care*. 2023 Jan;28(1):63-71.  
10 Available at: <https://onlinelibrary.wiley.com/doi/full/10.1111/nicc.12611>  
11  
12 22. Otchi E, Bannerman C, Lartey S, Amoo K, Odame E. Patient safety situational analysis in  
13 Ghana. *Journal of Patient Safety and Risk Management*. 2018;23 (6):257-263. Available at:  
14 doi:[10.1177/2516043518806366](https://doi.org/10.1177/2516043518806366)  
15  
16 23. Creswell JW, Creswell JD. *Research design: Qualitative, quantitative, and mixed methods*  
17 *approaches*. Sage publications; 2017 Nov 27.  
18  
19 24. Kwesimintsim Government Hospital. Health information records. 2021 June.  
20  
21 25. Yamanae T. *Statistics: An Introductory Analysis*. London: John Weather Hill. 1973.  
22  
23 26. Arabloo J, Rezapour A, EBADI FA, Mobasheri Y. Measuring patient safety culture in Iran  
24 using the Hospital survey on patient safety culture (HSOPS): an exploration of survey reliability  
25 and validity. 2012. Available at: [https://ijhr.iums.ac.ir/article\\_3826.html](https://ijhr.iums.ac.ir/article_3826.html)  
26  
27 27. Drolet, A. L., & Morrison, D. G. (2001). Do we really need multiple-item measures in service  
28 research?. *Journal of service research*, 3(3), 196-204. Available at:  
29 <https://journals.sagepub.com/doi/abs/10.1177/109467050133001>  
30  
31 28 . Bayuo J, Koduah AO. Pattern and outcomes of medical malpractice cases in Ghana: a  
32 systematic content analysis. *Ghana Medical Journal*. 2022 Dec 1;56(4):322-30. Available at:  
33 <https://www.ajol.info/index.php/gmj/article/view/237625>  
34  
35 29. EduCeleb. 83.5% fail Ghana's teachers licensure. 2023 June. [cited 2023 July 1]. Available at:  
36 <https://educeleb.com/83-5-fail-ghanas-teacher-licensure-exam/>  
37  
38 30 Statista. International poverty rate in Ghana from 2017 to 2022. 2022. [cited 2023 June 29].  
39 Available at: <https://www.statista.com/statistics/1222084/international-poverty-rate-in-ghana/>  
40  
41  
42  
43

#### Figure legends

44 **Figure 1: Prevalence of adverse events of patient safety culture protocols compliance**

45 **Source: Authors' construct, 2022.**

46  
47 **Figure 2: Effect of harms or problems encountered as a result of none adherence to patient**  
48 **safety culture protocol compliance**

49 **Source: Authors' construct, 2022.**  
50  
51  
52  
53  
54  
55  
56  
57  
58  
59  
60



## Experience harm

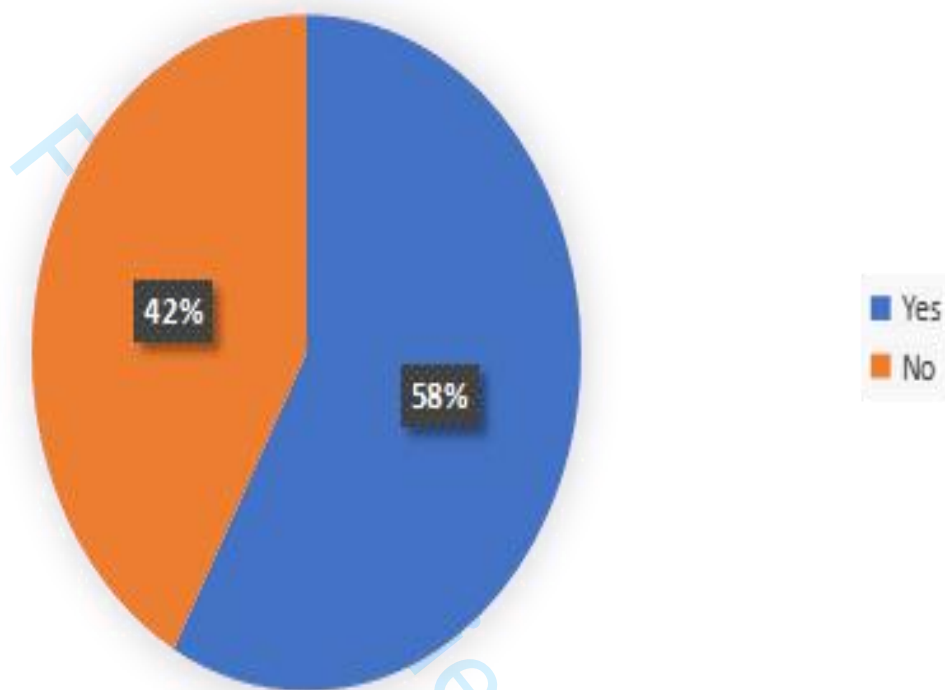

**Figure 1**

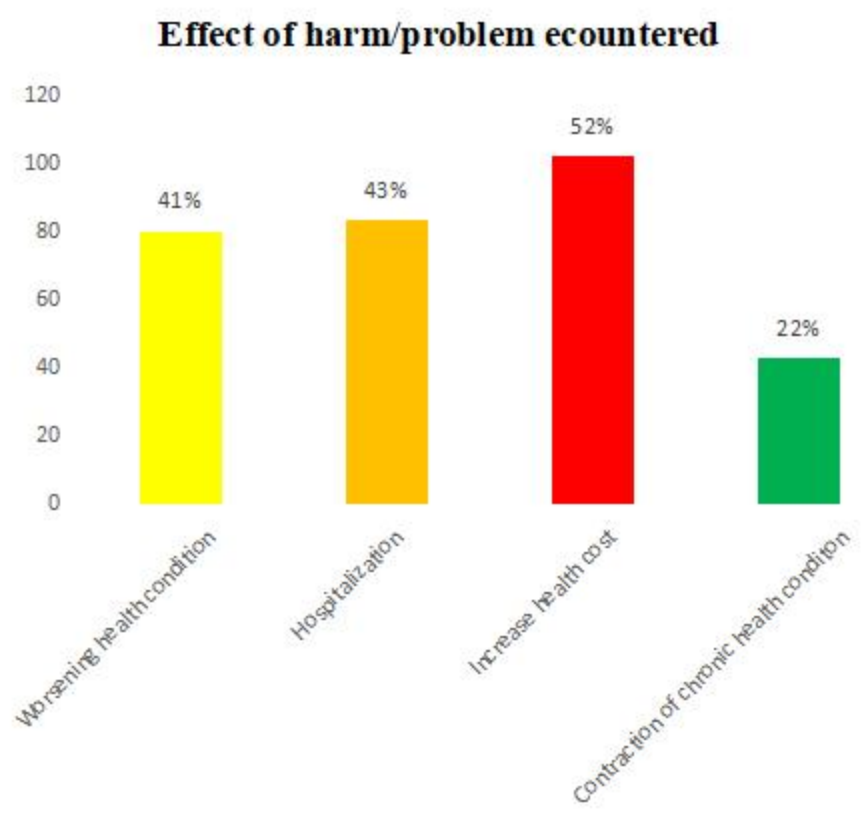

Figure 2

Review only

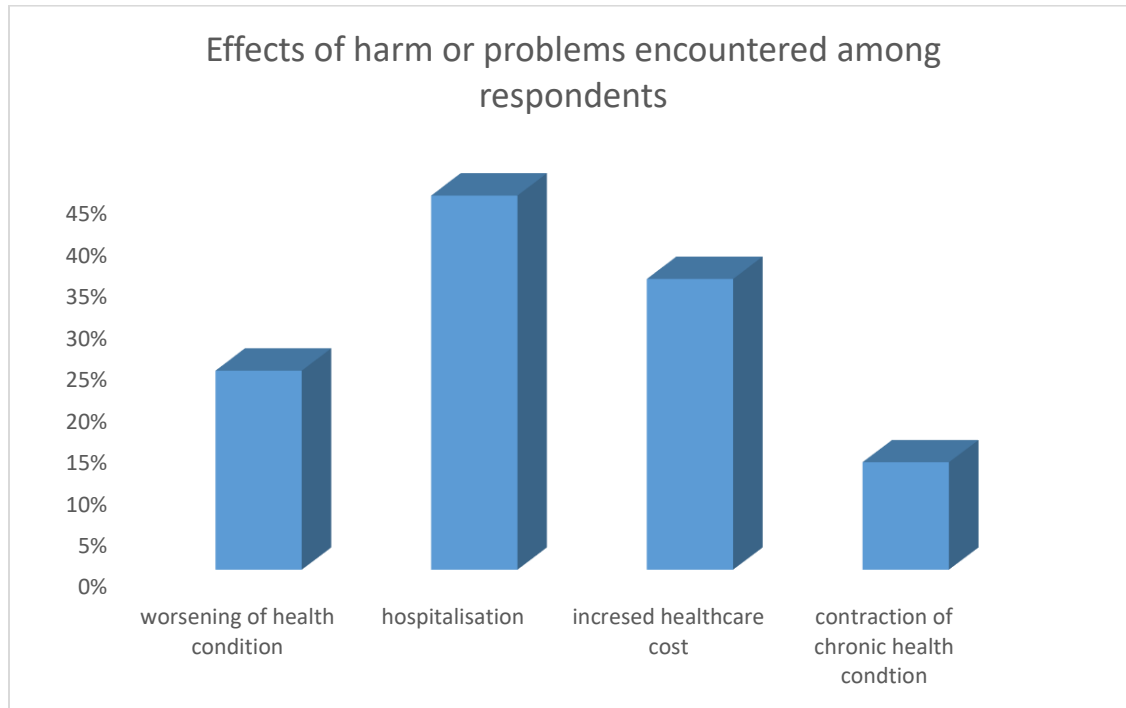

**Figure 1: Effects of harm or problems encountered among respondents**  
**Source: Field Survey, September (2022).**

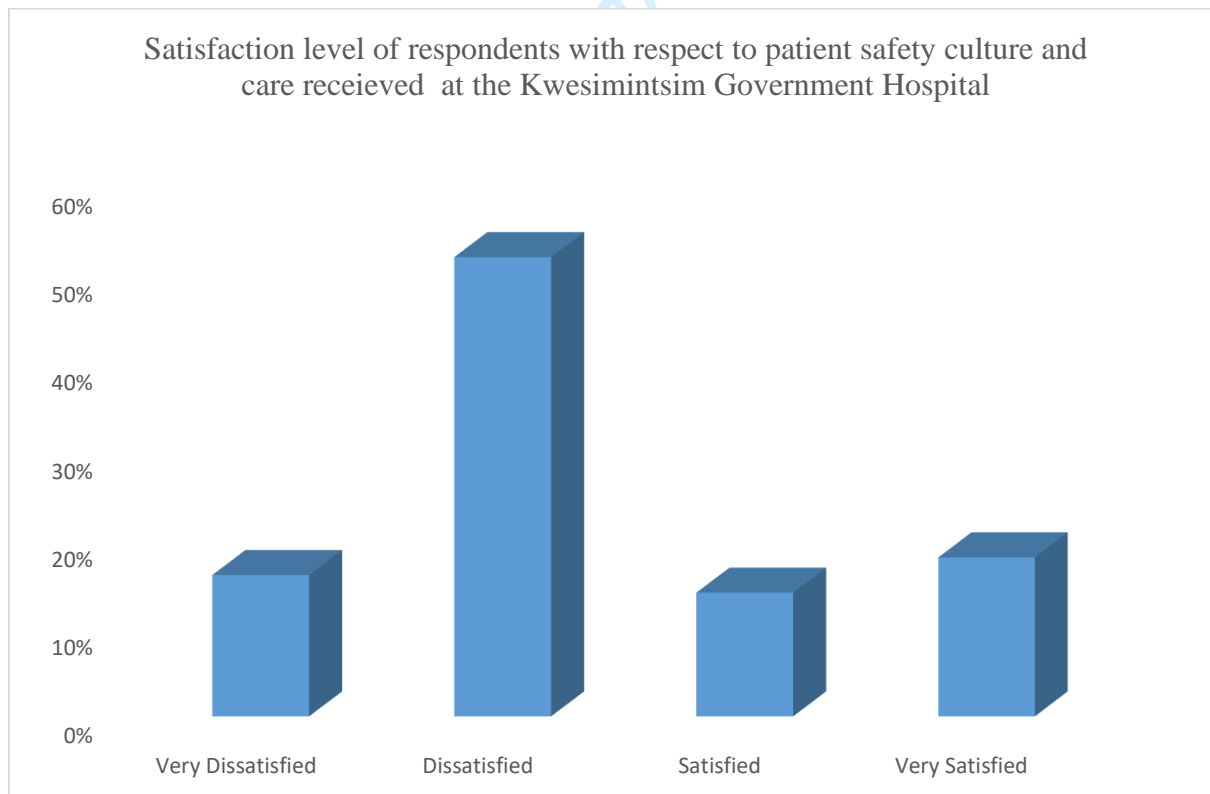

**Figure 2: Level of satisfaction with patient safety protocols and care received among the respondents**  
**Source: Field Survey, September (2022).**

**STROBE Statement—checklist of items that should be included in reports of observational studies**

| Item                   | No        | Page Number | Line Number          |
|------------------------|-----------|-------------|----------------------|
| Title and abstract     | <b>1</b>  | 1-2         | 1-84                 |
| Introduction           |           |             |                      |
| Background/rationale   | <b>2</b>  | 3-5         | 85-135               |
| Objectives             | <b>3</b>  | 5           | 136-144              |
| <b>Methods</b>         |           |             |                      |
| Study design           | <b>4</b>  | 5-9         | 145-219              |
| Setting                | <b>5</b>  | 6           | 152-166              |
| Participants           | <b>6</b>  | 7 and 9-10  | 167-180 and 223-242  |
| Variables              | <b>7</b>  | 7-8         | 192-198              |
| Data sources           | <b>8</b>  | 7           | 185-187              |
| Bias                   | <b>9</b>  | 8           | 199-206              |
| Study size             | <b>10</b> | 7           | 175-181              |
| Quantitative variables | <b>11</b> | 8           | 196-197              |
| Statistical methods    | <b>12</b> | 8 and 13-15 | 203-2016 and 285-315 |

|                   |            |       |         |
|-------------------|------------|-------|---------|
| <b>Results</b>    |            |       |         |
| Participants      | <b>13</b>  | 9-10  | 234-242 |
| Descriptive data  | <b>14</b>  | 10-13 | 243-283 |
| Outcome data      | <b>15</b>  | 10-13 | 243-283 |
| Main results      | <b>N/A</b> |       |         |
| Other analyses    | <b>17</b>  | 13-16 | 285-321 |
| <b>Discussion</b> |            |       |         |
| Key results       | <b>18</b>  | 19    | 391-393 |
| Limitations       | <b>19</b>  | 19    | 398-406 |
| Interpretation    | <b>20</b>  | 17-19 | 327-383 |
| Generalisability  | <b>21</b>  | 19    | 393-397 |
| Funding           | <b>22</b>  | 20    | 412-413 |
