# Supplementary material for: Patient safety culture and satisfaction in Ghana: a facility-based cross-sectional study
Source: PubMed Central journal article supplement — BMJ Open. 2024 Jan 30;14(1):e073190. doi: 10.1136/bmjopen-2023-073190 (PMC10828863; doi:10.1136/bmjopen-2023-073190), 2024-01-30
Supplement: bmjopen-2023-073190supp001.pdf [file bmjopen-2023-073190supp001.pdf]

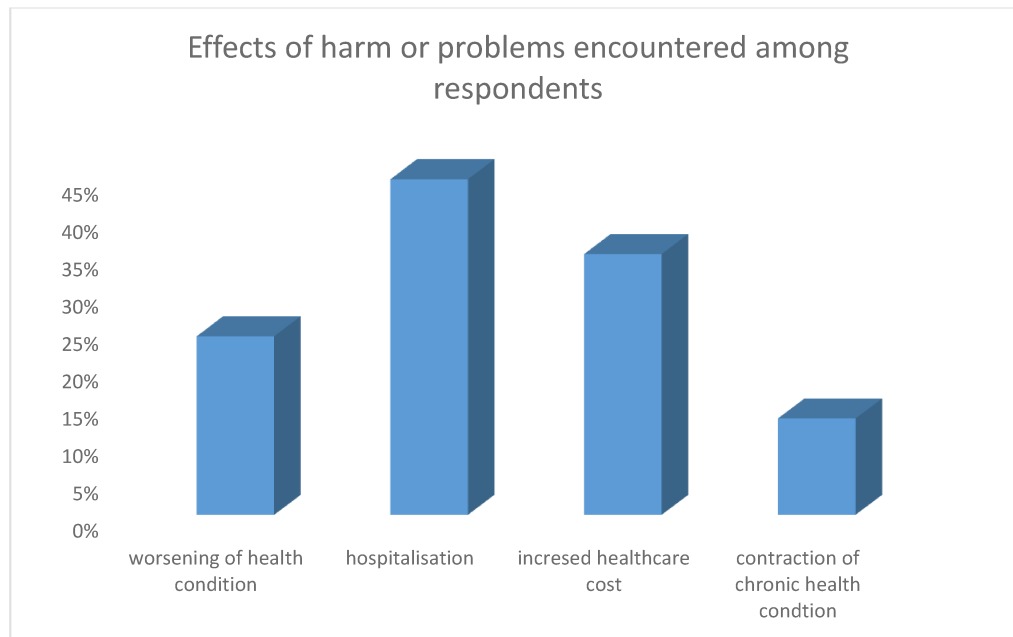

**Figure 1: Effects of harm or problems encountered among respondents**  
Source: Field Survey, September (2022).

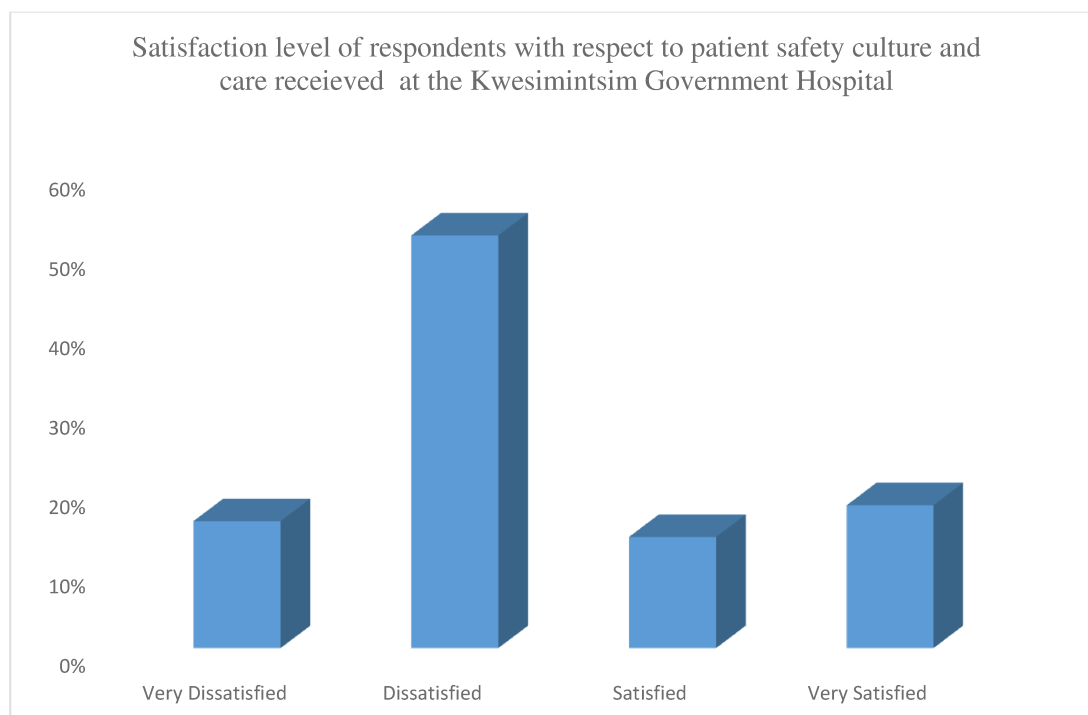

**Figure 2: Level of satisfaction with patient safety protocols and care received among the respondents**  
Source: Field Survey, September (2022).
